# Supplementary material
Source: publisher figshare collection journal article supplement (https://gsapubs.figshare.com/articles/dataset/_/22137662)
Supplement: Supplementary file 1 [file 1]

## Sheet: PlotDat6
Source sheet	Sheet1	0.379702	0.0514689	290		300		310		320		330		340		350		0.322405	0.045	0.323047	0.045	0.317529	0.0443921	0.401538	0.0535527	0.422532	0.0516056	0.493376	0.0503545	0.44793	0.0521482	0.395827	0.0519918	0.393743	0.0541834	0.396524	0.0530887	0.419119	0.0553506	0.376267	0.0501776	0.414042	0.0536598	0.419539	0.0521444	0.368645	0.0501026	0.399665	0.0534514
Plot name	Concordia3	0.370452	0.0507986	0.331201	0.0460135	0.344398	0.0476374	0.357726	0.0492638	0.371186	0.0508927	0.38478	0.0525242	0.398508	0.0541582	0.412373	0.0557947	0.322405	0.045	0.325715	0.0453312	0.330569	0.0460135	0.401093	0.0537745	0.421524	0.0520308	0.491673	0.0508051	0.446907	0.0525962	0.394904	0.0524392	0.393249	0.0544873	0.396108	0.0532862	0.418657	0.0555459	0.375427	0.0505889	0.413507	0.0539759	0.4189	0.0525039	0.367977	0.0505028	0.399074	0.0538136
Plot Type	1	0.404882	0.0498145	0.331189	0.0460255	0.344386	0.0476498	0.357713	0.0492767	0.371173	0.050906	0.384766	0.0525379	0.398493	0.0541724	0.412357	0.0558093	0.325715	0.0454115	0.329033	0.0457421	0.343738	0.0476374	0.399827	0.0539078	0.418554	0.0524085	0.486635	0.0512176	0.443894	0.0529893	0.392187	0.0528329	0.391834	0.0547128	0.394922	0.0533977	0.417337	0.0556417	0.372954	0.0509509	0.411963	0.054216	0.417039	0.0527976	0.366031	0.0508368	0.397364	0.0541014
1st free col	53	0.395124	0.0511687	0.331153	0.0460371	0.344348	0.0476618	0.357674	0.0492891	0.371132	0.0509188	0.384723	0.0525512	0.398449	0.054186	0.412311	0.0558234	0.329033	0.0458232	0.332359	0.0461532	0.357037	0.0492638	0.397787	0.0539473	0.413736	0.0527244	0.478454	0.0515763	0.439006	0.0533125	0.387782	0.0531579	0.389552	0.0548512	0.393014	0.0534188	0.415212	0.0556344	0.368945	0.0512497	0.409472	0.054371	0.414028	0.0530142	0.362883	0.0510917	0.394602	0.0543036
Sigma Level	1	0.348249	0.051044	0.331095	0.0460477	0.344287	0.0476728	0.35761	0.0493005	0.371065	0.0509307	0.384654	0.0525634	0.398377	0.0541986	0.412236	0.0558364	0.332359	0.046235	0.335694	0.0465645	0.370468	0.0508927	0.395052	0.0538916	0.407253	0.0529663	0.467447	0.0518672	0.432433	0.0535532	0.381858	0.0534016	0.386491	0.0548972	0.390455	0.0533488	0.412363	0.0555243	0.363553	0.0514738	0.406127	0.0544349	0.409983	0.0531453	0.358654	0.0512577	0.390893	0.0544125
Absolute Errs	FALSE	0.369279	0.0524473	0.331016	0.0460571	0.344205	0.0476825	0.357524	0.0493105	0.370976	0.050941	0.384561	0.0525741	0.39828	0.0542096	0.412136	0.0558478	0.335694	0.046647	0.339037	0.0469759	0.384031	0.0525242	0.391727	0.0537428	0.399357	0.0531249	0.454035	0.0520792	0.424425	0.0537024	0.374642	0.0535548	0.382769	0.0548491	0.387344	0.0531903	0.408898	0.0553156	0.356985	0.0516146	0.402059	0.0544051	0.405059	0.0531858	0.353506	0.0513285	0.38638	0.054424
Symbol Type	1	0.376096	0.0510471	0.33092	0.0460647	0.344105	0.0476905	0.35742	0.0493187	0.370867	0.0509495	0.384447	0.0525828	0.398162	0.0542187	0.412013	0.0558571	0.339037	0.0470592	0.342388	0.0473875	0.397729	0.0541582	0.38794	0.0535066	0.39035	0.0531941	0.438734	0.0522042	0.415291	0.0537541	0.366412	0.0536114	0.378528	0.0547086	0.383801	0.0529495	0.404952	0.0550163	0.349495	0.0516668	0.397423	0.054283	0.399445	0.0531343	0.347637	0.0513012	0.381237	0.0543376
Inverse Plot	FALSE	0.396365	0.0529585	0.330811	0.0460704	0.343991	0.0476964	0.357301	0.0493248	0.370743	0.0509558	0.384318	0.0525894	0.398027	0.0542254	0.411873	0.055864	0.342388	0.0474715	0.345747	0.0477992	0.411563	0.0557947	0.383837	0.0531921	0.380578	0.0531712	0.422132	0.0522374	0.405383	0.0537065	0.357484	0.0535694	0.373932	0.0544813	0.379962	0.0526356	0.400677	0.0546379	0.341369	0.0516282	0.392398	0.0540731	0.393357	0.0529927	0.341272	0.0511771	0.375661	0.0541565
Color Plot	TRUE	0.332964	0.0493063	0.330692	0.0460739	0.343867	0.0477	0.357171	0.0493286	0.370608	0.0509597	0.384177	0.0525934	0.397881	0.0542296	0.411721	0.0558683	0.345747	0.047884	0.349115	0.0482111	IsoLine	IsoLine	0.379574	0.0528113	0.370417	0.0530572	0.404867	0.0521774	0.39508	0.0535614	0.348201	0.0534304	0.369157	0.0541758	0.375975	0.0522606	0.396235	0.054195	0.33292	0.0515003	0.387176	0.0537835	0.38703	0.0527665	0.334656	0.0509608	0.369866	0.0538879
3D plot	FALSE	0.387286	0.0519999	0.330569	0.0460751	0.343738	0.0477012	0.357037	0.0493299	0.370468	0.050961	0.384031	0.0525947	0.397729	0.054231	0.411563	0.0558698	0.349115	0.0482967	0.352492	0.0486232			0.375317	0.052379	0.360258	0.0528563	0.387603	0.0520267	0.384779	0.0533244	0.33892	0.0531996	0.364387	0.0538039	0.371992	0.051839	0.391798	0.0537046	0.324473	0.0512882	0.381958	0.0534254	0.380705	0.0524643	0.328043	0.0506606	0.364075	0.0535419
Linear	FALSE	0.387112	0.05079	0.330445	0.0460739	0.343609	0.0477	0.356902	0.0493286	0.370327	0.0509597	0.383885	0.0525934	0.397577	0.0542296	0.411405	0.0558683	0.352492	0.0487095	0.355877	0.0490354			0.371228	0.0519117	0.35049	0.0525764	0.371003	0.0517909	0.374875	0.0530045	0.329997	0.052886	0.359804	0.0533798	0.368167	0.0513869	0.387537	0.0531855	0.316352	0.0509999	0.376945	0.0530125	0.374627	0.0520977	0.321688	0.0502882	0.358511	0.0531319
Data Range	BS3:BW5,BS7:BW9,BS11:BW15,BS17:BW18	0.334741	0.048779	0.330327	0.0460704	0.343485	0.0476964	0.356773	0.0493248	0.370192	0.0509558	0.383745	0.0525894	0.397431	0.0542254	0.411253	0.055864	0.355877	0.0491225	0.35927	0.0494478			0.367464	0.0514274	0.341489	0.0522282	0.355705	0.0514792	0.36575	0.052614	0.321776	0.0525016	0.355586	0.0529199	0.364646	0.0509218	0.383615	0.0526577	0.308869	0.0506465	0.37233	0.0525607	0.369028	0.0516809	0.315834	0.0498577	0.353387	0.0526737
Filled Symbols	TRUE	0.369973	0.0518762	0.330217	0.0460647	0.34337	0.0476905	0.356654	0.0493187	0.370068	0.0509495	0.383615	0.0525828	0.397297	0.0542187	0.411113	0.0558571	0.35927	0.0495356	0.362672	0.0498603			0.364171	0.0509447	0.333602	0.051825	0.342296	0.0511036	0.357753	0.052168	0.314572	0.0520612	0.351894	0.0524419	0.361566	0.0504615	0.380183	0.0521414	0.302313	0.0502416	0.368289	0.0520873	0.364124	0.0512299	0.310707	0.0493858	0.348901	0.0521848
ConcAge	TRUE	IsoLine	IsoLine	0.330122	0.0460571	0.34327	0.0476825	0.356549	0.0493105	0.369959	0.050941	0.383502	0.0525741	0.397178	0.0542096	0.41099	0.0558478	0.362672	0.0499489	0.366083	0.0502731			0.361475	0.0504821	0.32713	0.0513823	0.331293	0.0506783	0.351193	0.0516836	0.308662	0.0515817	0.348871	0.051964	0.359044	0.0500237	0.377373	0.0516566	0.296934	0.0498007	0.364978	0.0516106	0.360104	0.0507619	0.306504	0.0488906	0.345225	0.051684
ConcSwap	FALSE			0.330043	0.0460477	0.343188	0.0476728	0.356463	0.0493005	0.36987	0.0509307	0.383409	0.0525634	0.397082	0.0541986	0.410889	0.0558364	0.366083	0.0503624	0.369502	0.0506859			0.35948	0.0500574	0.322324	0.0509173	0.323118	0.0502199	0.346321	0.0511795	0.304274	0.0510816	0.346631	0.0515047	0.357177	0.0496253	0.375293	0.0512217	0.29294	0.0493409	0.362525	0.0511489	0.357122	0.0502951	0.303386	0.0483911	0.342499	0.0511907
1st Symbol-row	1			0.329984	0.0460371	0.343127	0.0476618	0.3564	0.0492891	0.369803	0.0509188	0.38334	0.0525512	0.39701	0.054186	0.410815	0.0558234	0.369502	0.050776	0.372929	0.051099			0.358261	0.049687	0.319367	0.0504476	0.318084	0.0497459	0.343324	0.0506749	0.301575	0.05058	0.345262	0.0510817	0.356037	0.0492815	0.374022	0.0508536	0.290484	0.0488797	0.361023	0.0507198	0.355292	0.0498472	0.301472	0.0479065	0.340829	0.0507236
				0.329948	0.0460255	0.34309	0.0476498	0.35636	0.0492767	0.369763	0.050906	0.383297	0.0525379	0.396965	0.0541724	0.410769	0.0558093	0.372929	0.0511898	0.376365	0.0515122			0.357866	0.0493851	0.318373	0.0499915	0.316387	0.0492746	0.342318	0.0501893	0.30067	0.0500962	0.344816	0.0507111	0.355669	0.0490055	0.373611	0.0505665	0.289661	0.0484349	0.36053	0.0503399	0.354685	0.0494356	0.300837	0.0474554	0.34028	0.0503009
				0.329936	0.0460135	0.343077	0.0476374	0.356347	0.0492638	0.369749	0.0508927	0.383283	0.0525242	0.39695	0.0541582	0.410753	0.0557947	0.376365	0.0516037	0.37981	0.0519255			0.358311	0.0491632	0.31938	0.0495664	0.31809	0.048824	0.343342	0.0497413	0.301594	0.0496489	0.34531	0.0504072	0.356085	0.048808	0.374073	0.0503712	0.290501	0.0480236	0.361066	0.0500239	0.355324	0.049076	0.301506	0.0470552	0.340871	0.0499387
				0.329948	0.0460015	0.34309	0.0476249	0.35636	0.0492509	0.369763	0.0508794	0.383297	0.0525104	0.396965	0.054144	0.410769	0.0557801	0.37981	0.0520179	0.383263	0.0523391			0.359578	0.0490299	0.32235	0.0491886	0.323129	0.0484114	0.346355	0.0493482	0.30431	0.0492551	0.346725	0.0501818	0.35727	0.0486966	0.375392	0.0502754	0.292974	0.0476616	0.362609	0.0497837	0.357185	0.0487823	0.303451	0.0467212	0.342581	0.049651
				0.329984	0.0459899	0.343127	0.0476129	0.3564	0.0492385	0.369803	0.0508666	0.38334	0.0524972	0.39701	0.0541303	0.410815	0.055766	0.383263	0.0524321	0.386725	0.0527528			0.361618	0.0489904	0.327169	0.0488727	0.331309	0.0480528	0.351242	0.049025	0.308715	0.0489301	0.349007	0.0500434	0.359179	0.0486754	0.377518	0.0502826	0.296983	0.0473628	0.365101	0.0496288	0.360196	0.0485658	0.306599	0.0464663	0.345343	0.0494488
				0.330043	0.0459792	0.343188	0.0476019	0.356463	0.0492271	0.36987	0.0508548	0.383409	0.052485	0.397082	0.0541177	0.410889	0.055753	0.386725	0.0528466	0.390196	0.0531666			0.364353	0.0490461	0.333651	0.0486308	0.342317	0.0477619	0.357816	0.0487843	0.314639	0.0486864	0.352068	0.0499973	0.361737	0.0487455	0.380367	0.0503927	0.302375	0.0471387	0.368445	0.0495649	0.364241	0.0484347	0.310828	0.0463003	0.349052	0.0493398
				0.330122	0.0459699	0.34327	0.0475922	0.356549	0.0492171	0.369959	0.0508444	0.383502	0.0524743	0.397178	0.0541067	0.41099	0.0557416	0.390196	0.0532612	0.393675	0.0535806			0.367677	0.049195	0.341548	0.0484722	0.355728	0.0475499	0.365824	0.0486351	0.321855	0.0485332	0.35579	0.0500455	0.364848	0.0489039	0.383831	0.0506015	0.308943	0.0469979	0.372514	0.0495946	0.369165	0.0483942	0.315976	0.0462295	0.353565	0.0493283
				0.330217	0.0459622	0.34337	0.0475843	0.356654	0.0492088	0.370068	0.0508359	0.383615	0.0524655	0.397297	0.0540976	0.411113	0.0557323	0.393675	0.053676	0.397163	0.0539948			0.371464	0.0494312	0.350555	0.048403	0.371029	0.0474249	0.374957	0.0485833	0.330085	0.0484766	0.360031	0.0501859	0.368391	0.0491448	0.387777	0.0509008	0.316433	0.0469458	0.37715	0.0497168	0.374779	0.0484457	0.321845	0.0462567	0.358708	0.0494148
				0.330327	0.0459565	0.343485	0.0475784	0.356773	0.0492027	0.370192	0.0508296	0.383745	0.052459	0.397431	0.0540909	0.411253	0.0557253	0.397163	0.0540909	0.40066	0.0544091			0.375568	0.0497457	0.360326	0.0484259	0.387631	0.0473917	0.384866	0.0486309	0.339013	0.0485186	0.364627	0.0504132	0.37223	0.0494587	0.392053	0.0512791	0.324559	0.0469844	0.382175	0.0499267	0.380867	0.0485873	0.32821	0.0463809	0.364284	0.0495958
				0.330445	0.045953	0.343609	0.0475747	0.356902	0.049199	0.370327	0.0508257	0.383885	0.052455	0.397577	0.0540868	0.411405	0.0557211	0.40066	0.054506	0.404165	0.0548236			0.37983	0.0501264	0.370487	0.0485399	0.404896	0.0474516	0.395169	0.048776	0.348296	0.0486576	0.369402	0.0507187	0.376217	0.0498337	0.396495	0.051722	0.333008	0.0471122	0.387397	0.0502162	0.387195	0.0488135	0.334826	0.0465972	0.370079	0.0498645
				0.330569	0.0459519	0.343738	0.0475735	0.357037	0.0491977	0.370468	0.0508244	0.384031	0.0524536	0.397729	0.0540854	0.411563	0.0557196	0.404165	0.0549212	0.40768	0.0552383			0.384088	0.0505587	0.380647	0.0487408	0.42216	0.0476024	0.40547	0.0490131	0.357578	0.0488884	0.374172	0.0510907	0.3802	0.0502553	0.400932	0.0522125	0.341455	0.0473244	0.392615	0.0505744	0.393519	0.0491157	0.341439	0.0468973	0.37587	0.0502104
				0.330692	0.045953	0.343867	0.0475747	0.357171	0.049199	0.370608	0.0508257	0.384177	0.052455	0.397881	0.0540868	0.411721	0.0557211	0.40768	0.0553367	0.411203	0.0556531			0.388177	0.051026	0.390415	0.0490207	0.43876	0.0478381	0.415373	0.049333	0.3665	0.049202	0.378755	0.0515147	0.384025	0.0507074	0.405193	0.0527316	0.349576	0.0476127	0.397628	0.0509872	0.399598	0.0494823	0.347794	0.0472698	0.381434	0.0506204
				0.330811	0.0459565	0.343991	0.0475784	0.357301	0.0492027	0.370743	0.0508296	0.384318	0.052459	0.398027	0.0540909	0.411873	0.0557253	0.411203	0.0557523	0.414735	0.0560681			0.39194	0.0515103	0.399415	0.0493689	0.454059	0.0481498	0.424499	0.0497235	0.374722	0.0495864	0.382973	0.0519746	0.387546	0.0511725	0.409115	0.0532594	0.357059	0.0479661	0.402243	0.0514391	0.405196	0.0498991	0.353648	0.0477003	0.386558	0.0510787
				0.33092	0.0459622	0.344105	0.0475843	0.35742	0.0492088	0.370867	0.0508359	0.384447	0.0524655	0.398162	0.0540976	0.412013	0.0557323	0.414735	0.056168	0.418275	0.0564833			0.395233	0.0519931	0.407303	0.0497721	0.467467	0.0485255	0.432495	0.0501695	0.381925	0.0500268	0.386664	0.0524527	0.390626	0.0516327	0.412547	0.0537757	0.363615	0.048371	0.406284	0.0519124	0.4101	0.0503501	0.358775	0.0481722	0.391044	0.0515676
				0.331016	0.0459699	0.344205	0.0475922	0.357524	0.0492171	0.370976	0.0508444	0.384561	0.0524743	0.39828	0.0541067	0.412136	0.0557416	0.418275	0.0565839	0.421825	0.0568986			0.397929	0.0524556	0.413774	0.0502148	0.47847	0.0489507	0.439056	0.0506538	0.387835	0.0505063	0.389688	0.0529305	0.393148	0.0520705	0.415357	0.0542605	0.368994	0.0488118	0.409595	0.0523891	0.41412	0.050818	0.362978	0.0486674	0.39472	0.0520683
				0.331095	0.0459792	0.344287	0.0476019	0.35761	0.0492271	0.371065	0.0508548	0.384654	0.052485	0.398377	0.0541177	0.412236	0.055753	0.421825	0.057	0.422693	0.057			0.399925	0.0528803	0.418581	0.0506798	0.486646	0.0494092	0.443928	0.051158	0.392224	0.0510064	0.391928	0.0533898	0.395015	0.052469	0.417437	0.0546954	0.372988	0.0492717	0.412048	0.0528509	0.417102	0.0512849	0.366096	0.0491669	0.397446	0.0525617
				0.331153	0.0459899	0.344348	0.0476129	0.357674	0.0492385	0.371132	0.0508666	0.384723	0.0524972	0.398449	0.0541303	0.412311	0.055766	0.421825	0.057	0.420961	0.057			0.401143	0.0532507	0.421538	0.0511495	0.491679	0.0498831	0.446924	0.0516626	0.394922	0.051508	0.393297	0.0538129	0.396155	0.0528128	0.418707	0.0550634	0.375444	0.0497328	0.41355	0.05328	0.418932	0.0517328	0.36801	0.0496515	0.399116	0.0530287
				0.331189	0.0460015	0.344386	0.0476249	0.357713	0.0492509	0.371173	0.0508794	0.384766	0.0525104	0.398493	0.054144	0.412357	0.0557801	IsoLine	IsoLine	0.418275	0.0566846			0.401538	0.0535527	0.422532	0.0516056	0.493376	0.0503545	0.44793	0.0521482	0.395827	0.0519918	0.393743	0.0541834	0.396524	0.0530887	0.419119	0.0553506	0.376267	0.0501776	0.414042	0.0536598	0.419539	0.0521444	0.368645	0.0501026	0.399665	0.0534514
				0.331201	0.0460135	0.344398	0.0476374	0.357726	0.0492638	0.371186	0.0508927	0.38478	0.0525242	0.398508	0.0541582	0.412373	0.0557947			0.414735	0.0562679			ErrEll	ErrEll	ErrEll	ErrEll	ErrEll	ErrEll	ErrEll	ErrEll	ErrEll	ErrEll	ErrEll	ErrEll	ErrEll	ErrEll	ErrEll	ErrEll	ErrEll	ErrEll	ErrEll	ErrEll	ErrEll	ErrEll	ErrEll	ErrEll	ErrEll	ErrEll
				ConcTikEll	ConcTikEll	ConcTikEll	ConcTikEll	ConcTikEll	ConcTikEll	ConcTikEll	ConcTikEll	ConcTikEll	ConcTikEll	ConcTikEll	ConcTikEll	ConcTikEll	ConcTikEll			0.411203	0.0558514
																				0.40768	0.055435
																				0.404165	0.0550188
																				0.40066	0.0546028
																				0.397163	0.054187
																				0.393675	0.0537713
																				0.390196	0.0533558
																				0.386725	0.0529404
																				0.383263	0.0525252
																				0.37981	0.0521102
																				0.376365	0.0516953
																				0.372929	0.0512806
																				0.369502	0.0508661
																				0.366083	0.0504517
																				0.362672	0.0500375
																				0.35927	0.0496234
																				0.355877	0.0492095
																				0.352492	0.0487958
																				0.349115	0.0483822
																				0.345747	0.0479688
																				0.342388	0.0475556
																				0.339037	0.0471425
																				0.335694	0.0467296
																				0.332359	0.0463169
																				0.329033	0.0459043
																				0.325715	0.0454919
																				0.322405	0.0450796
																				0.321768	0.045
																				0.323047	0.045
																				ConcBand	ConcBand
[truncated: 2 more columns]

## Sheet: PlotDat8
Source sheet	Sheet1	0.379702	0.0514689	0.282745	0.04	0.279171	0.0395431	0.401538	0.0535527	0.422532	0.0516056	0.493376	0.0503545	0.44793	0.0521482	0.395827	0.0519918	0.393743	0.0541834	0.396524	0.0530887	0.419119	0.0553506	0.376267	0.0501776	0.414042	0.0536598	0.419539	0.0521444	0.453101	0.0464292	0.368645	0.0501026	0.399665	0.0534514
Plot name	Concordia1	0.370452	0.0507986	0.282745	0.04	0.291832	0.0411569	0.401093	0.0537745	0.421524	0.0520308	0.491673	0.0508051	0.446907	0.0525962	0.394904	0.0524392	0.393249	0.0544873	0.396108	0.0532862	0.418657	0.0555459	0.375427	0.0505889	0.413507	0.0539759	0.4189	0.0525039	0.450836	0.0468975	0.367977	0.0505028	0.399074	0.0538136
Plot Type	1	0.404882	0.0498145	0.287573	0.0406156	0.304617	0.0427732	0.399827	0.0539078	0.418554	0.0524085	0.486635	0.0512176	0.443894	0.0529893	0.392187	0.0528329	0.391834	0.0547128	0.394922	0.0533977	0.417337	0.0556417	0.372954	0.0509509	0.411963	0.054216	0.417039	0.0527976	0.444131	0.0473334	0.366031	0.0508368	0.397364	0.0541014
1st free col	37	0.395124	0.0511687	0.292419	0.0412315	0.317529	0.0443921	0.397787	0.0539473	0.413736	0.0527244	0.478454	0.0515763	0.439006	0.0533125	0.387782	0.0531579	0.389552	0.0548512	0.393014	0.0534188	0.415212	0.0556344	0.368945	0.0512497	0.409472	0.054371	0.414028	0.0530142	0.433242	0.0477201	0.362883	0.0510917	0.394602	0.0543036
Sigma Level	1	0.348249	0.051044	0.297283	0.0418478	0.330569	0.0460135	0.395052	0.0538916	0.407253	0.0529663	0.467447	0.0518672	0.432433	0.0535532	0.381858	0.0534016	0.386491	0.0548972	0.390455	0.0533488	0.412363	0.0555243	0.363553	0.0514738	0.406127	0.0544349	0.409983	0.0531453	0.41859	0.0480428	0.358654	0.0512577	0.390893	0.0544125
Absolute Errs	FALSE	0.369279	0.0524473	0.302166	0.0424644	0.343738	0.0476374	0.391727	0.0537428	0.399357	0.0531249	0.454035	0.0520792	0.424425	0.0537024	0.374642	0.0535548	0.382769	0.0548491	0.387344	0.0531903	0.408898	0.0553156	0.356985	0.0516146	0.402059	0.0544051	0.405059	0.0531858	0.400737	0.0482889	0.353506	0.0513285	0.38638	0.054424
Symbol Type	1	0.376096	0.0510471	0.307067	0.0430815	0.357037	0.0492638	0.38794	0.0535066	0.39035	0.0531941	0.438734	0.0522042	0.415291	0.0537541	0.366412	0.0536114	0.378528	0.0547086	0.383801	0.0529495	0.404952	0.0550163	0.349495	0.0516668	0.397423	0.054283	0.399445	0.0531343	0.380368	0.0484492	0.347637	0.0513012	0.381237	0.0543376
Inverse Plot	FALSE	0.396365	0.0529585	0.311986	0.0436988	0.370468	0.0508927	0.383837	0.0531921	0.380578	0.0531712	0.422132	0.0522374	0.405383	0.0537065	0.357484	0.0535694	0.373932	0.0544813	0.379962	0.0526356	0.400677	0.0546379	0.341369	0.0516282	0.392398	0.0540731	0.393357	0.0529927	0.358268	0.0485173	0.341272	0.0511771	0.375661	0.0541565
Color Plot	TRUE	0.332964	0.0493063	0.316924	0.0443166	0.384031	0.0525242	0.379574	0.0528113	0.370417	0.0530572	0.404867	0.0521774	0.39508	0.0535614	0.348201	0.0534304	0.369157	0.0541758	0.375975	0.0522606	0.396235	0.054195	0.33292	0.0515003	0.387176	0.0537835	0.38703	0.0527665	0.335284	0.0484908	0.334656	0.0509608	0.369866	0.0538879
3D plot	FALSE	0.387286	0.0519999	0.321881	0.0449347	0.397729	0.0541582	0.375317	0.052379	0.360258	0.0528563	0.387603	0.0520267	0.384779	0.0533244	0.33892	0.0531996	0.364387	0.0538039	0.371992	0.051839	0.391798	0.0537046	0.324473	0.0512882	0.381958	0.0534254	0.380705	0.0524643	0.312301	0.0483706	0.328043	0.0506606	0.364075	0.0535419
Linear	FALSE	0.387112	0.05079	0.326856	0.0455532	0.411563	0.0557947	0.371228	0.0519117	0.35049	0.0525764	0.371003	0.0517909	0.374875	0.0530045	0.329997	0.052886	0.359804	0.0533798	0.368167	0.0513869	0.387537	0.0531855	0.316352	0.0509999	0.376945	0.0530125	0.374627	0.0520977	0.290201	0.0481613	0.321688	0.0502882	0.358511	0.0531319
Data Range	BS3:BW5,BS7:BW9,BS11:BW18	0.335292	0.046053	0.33185	0.046172	0.425533	0.0574338	0.367464	0.0514274	0.341489	0.0522282	0.355705	0.0514792	0.36575	0.052614	0.321776	0.0525016	0.355586	0.0529199	0.364646	0.0509218	0.383615	0.0526577	0.308869	0.0506465	0.37233	0.0525607	0.369028	0.0516809	0.269834	0.047871	0.315834	0.0498577	0.353387	0.0526737
Filled Symbols	TRUE	0.334741	0.048779	0.336862	0.0467913	IsoLine	IsoLine	0.364171	0.0509447	0.333602	0.051825	0.342296	0.0511036	0.357753	0.052168	0.314572	0.0520612	0.351894	0.0524419	0.361566	0.0504615	0.380183	0.0521414	0.302313	0.0502416	0.368289	0.0520873	0.364124	0.0512299	0.251983	0.0475108	0.310707	0.0493858	0.348901	0.0521848
ConcAge	TRUE	0.369973	0.0518762	0.341894	0.0474108			0.361475	0.0504821	0.32713	0.0513823	0.331293	0.0506783	0.351193	0.0516836	0.308662	0.0515817	0.348871	0.051964	0.359044	0.0500237	0.377373	0.0516566	0.296934	0.0498007	0.364978	0.0516106	0.360104	0.0507619	0.237333	0.0470946	0.306504	0.0488906	0.345225	0.051684
ConcSwap	FALSE	IsoLine	IsoLine	0.346944	0.0480308			0.35948	0.0500574	0.322324	0.0509173	0.323118	0.0502199	0.346321	0.0511795	0.304274	0.0510816	0.346631	0.0515047	0.357177	0.0496253	0.375293	0.0512217	0.29294	0.0493409	0.362525	0.0511489	0.357122	0.0502951	0.226447	0.0466383	0.303386	0.0483911	0.342499	0.0511907
1st Symbol-row	1			0.352014	0.0486511			0.358261	0.049687	0.319367	0.0504476	0.318084	0.0497459	0.343324	0.0506749	0.301575	0.05058	0.345262	0.0510817	0.356037	0.0492815	0.374022	0.0508536	0.290484	0.0488797	0.361023	0.0507198	0.355292	0.0498472	0.219745	0.0461596	0.301472	0.0479065	0.340829	0.0507236
				0.357103	0.0492718			0.357866	0.0493851	0.318373	0.0499915	0.316387	0.0492746	0.342318	0.0501893	0.30067	0.0500962	0.344816	0.0507111	0.355669	0.0490055	0.373611	0.0505665	0.289661	0.0484349	0.36053	0.0503399	0.354685	0.0494356	0.217483	0.0456768	0.300837	0.0474554	0.34028	0.0503009
				0.36221	0.0498928			0.358311	0.0491632	0.31938	0.0495664	0.31809	0.048824	0.343342	0.0497413	0.301594	0.0496489	0.34531	0.0504072	0.356085	0.048808	0.374073	0.0503712	0.290501	0.0480236	0.361066	0.0500239	0.355324	0.049076	0.219748	0.0452084	0.301506	0.0470552	0.340871	0.0499387
				0.367337	0.0505142			0.359578	0.0490299	0.32235	0.0491886	0.323129	0.0484114	0.346355	0.0493482	0.30431	0.0492551	0.346725	0.0501818	0.35727	0.0486966	0.375392	0.0502754	0.292974	0.0476616	0.362609	0.0497837	0.357185	0.0487823	0.226453	0.0447725	0.303451	0.0467212	0.342581	0.049651
				0.372483	0.051136			0.361618	0.0489904	0.327169	0.0488727	0.331309	0.0480528	0.351242	0.049025	0.308715	0.0489301	0.349007	0.0500434	0.359179	0.0486754	0.377518	0.0502826	0.296983	0.0473628	0.365101	0.0496288	0.360196	0.0485658	0.237341	0.0443858	0.306599	0.0464663	0.345343	0.0494488
				0.377649	0.0517582			0.364353	0.0490461	0.333651	0.0486308	0.342317	0.0477619	0.357816	0.0487843	0.314639	0.0486864	0.352068	0.0499973	0.361737	0.0487455	0.380367	0.0503927	0.302375	0.0471387	0.368445	0.0495649	0.364241	0.0484347	0.251994	0.0440632	0.310828	0.0463003	0.349052	0.0493398
				0.382834	0.0523807			0.367677	0.049195	0.341548	0.0484722	0.355728	0.0475499	0.365824	0.0486351	0.321855	0.0485332	0.35579	0.0500455	0.364848	0.0489039	0.383831	0.0506015	0.308943	0.0469979	0.372514	0.0495946	0.369165	0.0483942	0.269847	0.043817	0.315976	0.0462295	0.353565	0.0493283
				0.388039	0.0530036			0.371464	0.0494312	0.350555	0.048403	0.371029	0.0474249	0.374957	0.0485833	0.330085	0.0484766	0.360031	0.0501859	0.368391	0.0491448	0.387777	0.0509008	0.316433	0.0469458	0.37715	0.0497168	0.374779	0.0484457	0.290215	0.0436568	0.321845	0.0462567	0.358708	0.0494148
				0.393263	0.0536269			0.375568	0.0497457	0.360326	0.0484259	0.387631	0.0473917	0.384866	0.0486309	0.339013	0.0485186	0.364627	0.0504132	0.37223	0.0494587	0.392053	0.0512791	0.324559	0.0469844	0.382175	0.0499267	0.380867	0.0485873	0.312316	0.0435886	0.32821	0.0463809	0.364284	0.0495958
				0.398507	0.0542505			0.37983	0.0501264	0.370487	0.0485399	0.404896	0.0474516	0.395169	0.048776	0.348296	0.0486576	0.369402	0.0507187	0.376217	0.0498337	0.396495	0.051722	0.333008	0.0471122	0.387397	0.0502162	0.387195	0.0488135	0.3353	0.0436152	0.334826	0.0465972	0.370079	0.0498645
				0.40377	0.0548745			0.384088	0.0505587	0.380647	0.0487408	0.42216	0.0476024	0.40547	0.0490131	0.357578	0.0488884	0.374172	0.0510907	0.3802	0.0502553	0.400932	0.0522125	0.341455	0.0473244	0.392615	0.0505744	0.393519	0.0491157	0.358283	0.0437354	0.341439	0.0468973	0.37587	0.0502104
				0.409053	0.0554988			0.388177	0.051026	0.390415	0.0490207	0.43876	0.0478381	0.415373	0.049333	0.3665	0.049202	0.378755	0.0515147	0.384025	0.0507074	0.405193	0.0527316	0.349576	0.0476127	0.397628	0.0509872	0.399598	0.0494823	0.380383	0.0439447	0.347794	0.0472698	0.381434	0.0506204
				0.414357	0.0561236			0.39194	0.0515103	0.399415	0.0493689	0.454059	0.0481498	0.424499	0.0497235	0.374722	0.0495864	0.382973	0.0519746	0.387546	0.0511725	0.409115	0.0532594	0.357059	0.0479661	0.402243	0.0514391	0.405196	0.0498991	0.40075	0.044235	0.353648	0.0477003	0.386558	0.0510787
				0.41968	0.0567487			0.395233	0.0519931	0.407303	0.0497721	0.467467	0.0485255	0.432495	0.0501695	0.381925	0.0500268	0.386664	0.0524527	0.390626	0.0516327	0.412547	0.0537757	0.363615	0.048371	0.406284	0.0519124	0.4101	0.0503501	0.418601	0.0445952	0.358775	0.0481722	0.391044	0.0515676
				0.425023	0.0573742			0.397929	0.0524556	0.413774	0.0502148	0.47847	0.0489507	0.439056	0.0506538	0.387835	0.0505063	0.389688	0.0529305	0.393148	0.0520705	0.415357	0.0542605	0.368994	0.0488118	0.409595	0.0523891	0.41412	0.050818	0.433251	0.0450114	0.362978	0.0486674	0.39472	0.0520683
				0.430387	0.058			0.399925	0.0528803	0.418581	0.0506798	0.486646	0.0494092	0.443928	0.051158	0.392224	0.0510064	0.391928	0.0533898	0.395015	0.052469	0.417437	0.0546954	0.372988	0.0492717	0.412048	0.0528509	0.417102	0.0512849	0.444136	0.0454676	0.366096	0.0491669	0.397446	0.0525617
				0.430387	0.058			0.401143	0.0532507	0.421538	0.0511495	0.491679	0.0498831	0.446924	0.0516626	0.394922	0.051508	0.393297	0.0538129	0.396155	0.0528128	0.418707	0.0550634	0.375444	0.0497328	0.41355	0.05328	0.418932	0.0517328	0.450839	0.0459463	0.36801	0.0496515	0.399116	0.0530287
				IsoLine	IsoLine			0.401538	0.0535527	0.422532	0.0516056	0.493376	0.0503545	0.44793	0.0521482	0.395827	0.0519918	0.393743	0.0541834	0.396524	0.0530887	0.419119	0.0553506	0.376267	0.0501776	0.414042	0.0536598	0.419539	0.0521444	0.453101	0.0464292	0.368645	0.0501026	0.399665	0.0534514
								ErrEll	ErrEll	ErrEll	ErrEll	ErrEll	ErrEll	ErrEll	ErrEll	ErrEll	ErrEll	ErrEll	ErrEll	ErrEll	ErrEll	ErrEll	ErrEll	ErrEll	ErrEll	ErrEll	ErrEll	ErrEll	ErrEll	ErrEll	ErrEll	ErrEll	ErrEll	ErrEll	ErrEll

## Sheet: PlotDat5
Source sheet	Sheet1	0.379702	0.0514689	0.221375	0.032	0.217708	0.0315113	0.401538	0.0535527	0.422532	0.0516056	0.493376	0.0503545	0.429732	0.0390595	0.44793	0.0521482	0.395827	0.0519918	0.393743	0.0541834	0.720207	0.0407298	0.396524	0.0530887	0.419119	0.0553506	0.376267	0.0501776	0.414042	0.0536598	0.419539	0.0521444	0.453101	0.0464292	0.368645	0.0501026	0.399665	0.0534514
Plot name	Concordia2	0.370452	0.0507986	0.221375	0.032	0.24193	0.0347165	0.401093	0.0537745	0.421524	0.0520308	0.491673	0.0508051	0.427967	0.0394288	0.446907	0.0525962	0.394904	0.0524392	0.393249	0.0544873	0.711035	0.0417155	0.396108	0.0532862	0.418657	0.0555459	0.375427	0.0505889	0.413507	0.0539759	0.4189	0.0525039	0.450836	0.0468975	0.367977	0.0505028	0.399074	0.0538136
Plot Type	1	0.404882	0.0498145	0.228554	0.0329531	0.266635	0.0379317	0.399827	0.0539078	0.418554	0.0524085	0.486635	0.0512176	0.422743	0.0397697	0.443894	0.0529893	0.392187	0.0528329	0.391834	0.0547128	0.683873	0.0426507	0.394922	0.0533977	0.417337	0.0556417	0.372954	0.0509509	0.411963	0.054216	0.417039	0.0527976	0.444131	0.0473334	0.366031	0.0508368	0.397364	0.0541014
1st free col	41	0.33796	0.0386924	0.235775	0.0339071	0.291832	0.0411569	0.397787	0.0539473	0.413736	0.0527244	0.478454	0.0515763	0.414261	0.0400693	0.439006	0.0533125	0.387782	0.0531579	0.389552	0.0548512	0.639765	0.0434995	0.393014	0.0534188	0.415212	0.0556344	0.368945	0.0512497	0.409472	0.054371	0.414028	0.0530142	0.433242	0.0477201	0.362883	0.0510917	0.394602	0.0543036
Sigma Level	1	0.395124	0.0511687	0.243039	0.0348619	0.317529	0.0443921	0.395052	0.0538916	0.407253	0.0529663	0.467447	0.0518672	0.402847	0.0403159	0.432433	0.0535532	0.381858	0.0534016	0.386491	0.0548972	0.580405	0.0442293	0.390455	0.0533488	0.412363	0.0555243	0.363553	0.0514738	0.406127	0.0544349	0.409983	0.0531453	0.41859	0.0480428	0.358654	0.0512577	0.390893	0.0544125
Absolute Errs	FALSE	0.348249	0.051044	0.250345	0.0358176	0.343738	0.0476374	0.391727	0.0537428	0.399357	0.0531249	0.454035	0.0520792	0.388939	0.0405002	0.424425	0.0537024	0.374642	0.0535548	0.382769	0.0548491	0.508076	0.0448121	0.387344	0.0531903	0.408898	0.0553156	0.356985	0.0516146	0.402059	0.0544051	0.405059	0.0531858	0.400737	0.0482889	0.353506	0.0513285	0.38638	0.054424
Symbol Type	1	0.369279	0.0524473	0.257694	0.0367743	0.370468	0.0508927	0.38794	0.0535066	0.39035	0.0531941	0.438734	0.0522042	0.373073	0.040615	0.415291	0.0537541	0.366412	0.0536114	0.378528	0.0547086	0.425556	0.0452254	0.383801	0.0529495	0.404952	0.0550163	0.349495	0.0516668	0.397423	0.054283	0.399445	0.0531343	0.380368	0.0484492	0.347637	0.0513012	0.381237	0.0543376
Inverse Plot	FALSE	0.242902	0.0404028	0.265087	0.0377318	0.397729	0.0541582	0.383837	0.0531921	0.380578	0.0531712	0.422132	0.0522374	0.355856	0.0406559	0.405383	0.0537065	0.357484	0.0535694	0.373932	0.0544813	0.336016	0.0454534	0.379962	0.0526356	0.400677	0.0546379	0.341369	0.0516282	0.392398	0.0540731	0.393357	0.0529927	0.358268	0.0485173	0.341272	0.0511771	0.375661	0.0541565
Color Plot	TRUE	0.376096	0.0510471	0.272523	0.0386902	0.425533	0.0574338	0.379574	0.0528113	0.370417	0.0530572	0.404867	0.0521774	0.337953	0.0406213	0.39508	0.0535614	0.348201	0.0534304	0.369157	0.0541758	0.242899	0.0454873	0.375975	0.0522606	0.396235	0.054195	0.33292	0.0515003	0.387176	0.0537835	0.38703	0.0527665	0.335284	0.0484908	0.334656	0.0509608	0.369866	0.0538879
3D plot	FALSE	0.396365	0.0529585	0.280003	0.0396494	IsoLine	IsoLine	0.375317	0.052379	0.360258	0.0528563	0.387603	0.0520267	0.320049	0.0405126	0.384779	0.0533244	0.33892	0.0531996	0.364387	0.0538039	0.149781	0.0453258	0.371992	0.051839	0.391798	0.0537046	0.324473	0.0512882	0.381958	0.0534254	0.380705	0.0524643	0.312301	0.0483706	0.328043	0.0506606	0.364075	0.0535419
Linear	FALSE	0.332964	0.0493063	0.287526	0.0406096			0.371228	0.0519117	0.35049	0.0525764	0.371003	0.0517909	0.302834	0.040334	0.374875	0.0530045	0.329997	0.052886	0.359804	0.0533798	0.0602423	0.0449751	0.368167	0.0513869	0.387537	0.0531855	0.316352	0.0509999	0.376945	0.0530125	0.374627	0.0520977	0.290201	0.0481613	0.321688	0.0502882	0.358511	0.0531319
Data Range	BS3:BW18	0.387286	0.0519999	0.295094	0.0415706			0.367464	0.0514274	0.341489	0.0522282	0.355705	0.0514792	0.286968	0.0400923	0.36575	0.052614	0.321776	0.0525016	0.355586	0.0529199	-0.0222771	0.0444488	0.364646	0.0509218	0.383615	0.0526577	0.308869	0.0506465	0.37233	0.0525607	0.369028	0.0516809	0.269834	0.047871	0.315834	0.0498577	0.353387	0.0526737
Filled Symbols	TRUE	0.387112	0.05079	0.302706	0.0425325			0.364171	0.0509447	0.333602	0.051825	0.342296	0.0511036	0.273063	0.0397967	0.357753	0.052168	0.314572	0.0520612	0.351894	0.0524419	-0.0946058	0.0437669	0.361566	0.0504615	0.380183	0.0521414	0.302313	0.0502416	0.368289	0.0520873	0.364124	0.0512299	0.251983	0.0475108	0.310707	0.0493858	0.348901	0.0521848
ConcAge	TRUE	0.335292	0.046053	0.310363	0.0434954			0.361475	0.0504821	0.32713	0.0513823	0.331293	0.0506783	0.261651	0.0394588	0.351193	0.0516836	0.308662	0.0515817	0.348871	0.051964	-0.153964	0.0429557	0.359044	0.0500237	0.377373	0.0516566	0.296934	0.0498007	0.364978	0.0516106	0.360104	0.0507619	0.237333	0.0470946	0.306504	0.0488906	0.345225	0.051684
ConcSwap	FALSE	0.334741	0.048779	0.318065	0.0444591			0.35948	0.0500574	0.322324	0.0509173	0.323118	0.0502199	0.253172	0.0390914	0.346321	0.0511795	0.304274	0.0510816	0.346631	0.0515047	-0.198071	0.0420464	0.357177	0.0496253	0.375293	0.0512217	0.29294	0.0493409	0.362525	0.0511489	0.357122	0.0502951	0.226447	0.0466383	0.303386	0.0483911	0.342499	0.0511907
1st Symbol-row	1	0.369973	0.0518762	0.325813	0.0454237			0.358261	0.049687	0.319367	0.0504476	0.318084	0.0497459	0.247951	0.0387086	0.343324	0.0506749	0.301575	0.05058	0.345262	0.0510817	-0.225232	0.041074	0.356037	0.0492815	0.374022	0.0508536	0.290484	0.0488797	0.361023	0.0507198	0.355292	0.0498472	0.219745	0.0461596	0.301472	0.0479065	0.340829	0.0507236
		IsoLine	IsoLine	0.333606	0.0463892			0.357866	0.0493851	0.318373	0.0499915	0.316387	0.0492746	0.246189	0.0383253	0.342318	0.0501893	0.30067	0.0500962	0.344816	0.0507111	-0.234403	0.0400758	0.355669	0.0490055	0.373611	0.0505665	0.289661	0.0484349	0.36053	0.0503399	0.354685	0.0494356	0.217483	0.0456768	0.300837	0.0474554	0.34028	0.0503009
				0.341444	0.0473555			0.358311	0.0491632	0.31938	0.0495664	0.31809	0.048824	0.247954	0.037956	0.343342	0.0497413	0.301594	0.0496489	0.34531	0.0504072	-0.225231	0.0390901	0.356085	0.048808	0.374073	0.0503712	0.290501	0.0480236	0.361066	0.0500239	0.355324	0.049076	0.219748	0.0452084	0.301506	0.0470552	0.340871	0.0499387
				0.349329	0.0483228			0.359578	0.0490299	0.32235	0.0491886	0.323129	0.0484114	0.253177	0.037615	0.346355	0.0493482	0.30431	0.0492551	0.346725	0.0501818	-0.198069	0.0381549	0.35727	0.0486966	0.375392	0.0502754	0.292974	0.0476616	0.362609	0.0497837	0.357185	0.0487823	0.226453	0.0447725	0.303451	0.0467212	0.342581	0.049651
				0.35726	0.049291			0.361618	0.0489904	0.327169	0.0488727	0.331309	0.0480528	0.261659	0.0373155	0.351242	0.049025	0.308715	0.0489301	0.349007	0.0500434	-0.15396	0.0373061	0.359179	0.0486754	0.377518	0.0502826	0.296983	0.0473628	0.365101	0.0496288	0.360196	0.0485658	0.237341	0.0443858	0.306599	0.0464663	0.345343	0.0494488
				0.365238	0.05026			0.364353	0.0490461	0.333651	0.0486308	0.342317	0.0477619	0.273074	0.0370688	0.357816	0.0487843	0.314639	0.0486864	0.352068	0.0499973	-0.0946009	0.0365763	0.361737	0.0487455	0.380367	0.0503927	0.302375	0.0471387	0.368445	0.0495649	0.364241	0.0484347	0.251994	0.0440632	0.310828	0.0463003	0.349052	0.0493398
				0.373263	0.05123			0.367677	0.049195	0.341548	0.0484722	0.355728	0.0475499	0.286981	0.0368846	0.365824	0.0486351	0.321855	0.0485332	0.35579	0.0500455	-0.0222713	0.0359935	0.364848	0.0489039	0.383831	0.0506015	0.308943	0.0469979	0.372514	0.0495946	0.369165	0.0483942	0.269847	0.043817	0.315976	0.0462295	0.353565	0.0493283
				0.381334	0.0522008			0.371464	0.0494312	0.350555	0.048403	0.371029	0.0474249	0.302848	0.0367698	0.374957	0.0485833	0.330085	0.0484766	0.360031	0.0501859	0.0602488	0.0355802	0.368391	0.0491448	0.387777	0.0509008	0.316433	0.0469458	0.37715	0.0497168	0.374779	0.0484457	0.290215	0.0436568	0.321845	0.0462567	0.358708	0.0494148
				0.389454	0.0531726			0.375568	0.0497457	0.360326	0.0484259	0.387631	0.0473917	0.320064	0.0367289	0.384866	0.0486309	0.339013	0.0485186	0.364627	0.0504132	0.149788	0.0353522	0.37223	0.0494587	0.392053	0.0512791	0.324559	0.0469844	0.382175	0.0499267	0.380867	0.0485873	0.312316	0.0435886	0.32821	0.0463809	0.364284	0.0495958
				0.397621	0.0541452			0.37983	0.0501264	0.370487	0.0485399	0.404896	0.0474516	0.337968	0.0367635	0.395169	0.048776	0.348296	0.0486576	0.369402	0.0507187	0.242906	0.0353183	0.376217	0.0498337	0.396495	0.051722	0.333008	0.0471122	0.387397	0.0502162	0.387195	0.0488135	0.3353	0.0436152	0.334826	0.0465972	0.370079	0.0498645
				0.405835	0.0551188			0.384088	0.0505587	0.380647	0.0487408	0.42216	0.0476024	0.355872	0.0368721	0.40547	0.0490131	0.357578	0.0488884	0.374172	0.0510907	0.336023	0.0354798	0.3802	0.0502553	0.400932	0.0522125	0.341455	0.0473244	0.392615	0.0505744	0.393519	0.0491157	0.358283	0.0437354	0.341439	0.0468973	0.37587	0.0502104
				0.414099	0.0560932			0.388177	0.051026	0.390415	0.0490207	0.43876	0.0478381	0.373087	0.0370508	0.415373	0.049333	0.3665	0.049202	0.378755	0.0515147	0.425562	0.0358305	0.384025	0.0507074	0.405193	0.0527316	0.349576	0.0476127	0.397628	0.0509872	0.399598	0.0494823	0.380383	0.0439447	0.347794	0.0472698	0.381434	0.0506204
				0.422411	0.0570686			0.39194	0.0515103	0.399415	0.0493689	0.454059	0.0481498	0.388952	0.0372925	0.424499	0.0497235	0.374722	0.0495864	0.382973	0.0519746	0.508082	0.0363569	0.387546	0.0511725	0.409115	0.0532594	0.357059	0.0479661	0.402243	0.0514391	0.405196	0.0498991	0.40075	0.044235	0.353648	0.0477003	0.386558	0.0510787
				0.430771	0.0580448			0.395233	0.0519931	0.407303	0.0497721	0.467467	0.0485255	0.402858	0.037588	0.432495	0.0501695	0.381925	0.0500268	0.386664	0.0524527	0.58041	0.0370387	0.390626	0.0516327	0.412547	0.0537757	0.363615	0.048371	0.406284	0.0519124	0.4101	0.0503501	0.418601	0.0445952	0.358775	0.0481722	0.391044	0.0515676
				0.439181	0.059022			0.397929	0.0524556	0.413774	0.0502148	0.47847	0.0489507	0.41427	0.037926	0.439056	0.0506538	0.387835	0.0505063	0.389688	0.0529305	0.639769	0.0378499	0.393148	0.0520705	0.415357	0.0542605	0.368994	0.0488118	0.409595	0.0523891	0.41412	0.050818	0.433251	0.0450114	0.362978	0.0486674	0.39472	0.0520683
				0.44764	0.06			0.399925	0.0528803	0.418581	0.0506798	0.486646	0.0494092	0.422749	0.0382934	0.443928	0.051158	0.392224	0.0510064	0.391928	0.0533898	0.683876	0.0387592	0.395015	0.052469	0.417437	0.0546954	0.372988	0.0492717	0.412048	0.0528509	0.417102	0.0512849	0.444136	0.0454676	0.366096	0.0491669	0.397446	0.0525617
				0.44764	0.06			0.401143	0.0532507	0.421538	0.0511495	0.491679	0.0498831	0.42797	0.0386761	0.446924	0.0516626	0.394922	0.051508	0.393297	0.0538129	0.711037	0.0397316	0.396155	0.0528128	0.418707	0.0550634	0.375444	0.0497328	0.41355	0.05328	0.418932	0.0517328	0.450839	0.0459463	0.36801	0.0496515	0.399116	0.0530287
				IsoLine	IsoLine			0.401538	0.0535527	0.422532	0.0516056	0.493376	0.0503545	0.429732	0.0390595	0.44793	0.0521482	0.395827	0.0519918	0.393743	0.0541834	0.720207	0.0407298	0.396524	0.0530887	0.419119	0.0553506	0.376267	0.0501776	0.414042	0.0536598	0.419539	0.0521444	0.453101	0.0464292	0.368645	0.0501026	0.399665	0.0534514
								ErrEll	ErrEll	ErrEll	ErrEll	ErrEll	ErrEll	ErrEll	ErrEll	ErrEll	ErrEll	ErrEll	ErrEll	ErrEll	ErrEll	ErrEll	ErrEll	ErrEll	ErrEll	ErrEll	ErrEll	ErrEll	ErrEll	ErrEll	ErrEll	ErrEll	ErrEll	ErrEll	ErrEll	ErrEll	ErrEll	ErrEll	ErrEll

## Sheet: PlotDat7
Source sheet	Sheet1	19.4292	0.0535054	290		300		310		320		330		340		350		360		17	0.0539381	17	0.0538268	22.5265	0.0518772	20.365	0.0535054	20.6151	0.0528908	21.0512	0.0589482	20.5306	0.0560051	20.5764	0.0494816	19.9574	0.0510659	20.5012	0.0534351	19.8428	0.0542823	21.2524	0.0489772	20.1319	0.0540168	20.6177	0.0552786	21.5731	0.0497708
Plot name	Concordia4	19.6856	0.0528908	21.7619	0.0521743	21.0201	0.0524034	20.3261	0.052634	19.6756	0.0528659	19.0644	0.0530994	18.4893	0.0533342	17.947	0.0535705	17.4348	0.0538083	17	0.0539381	17	0.0538268	21.7328	0.0521045	20.347	0.0538334	20.5972	0.0542571	21.0324	0.0613987	20.5117	0.057357	20.5575	0.0507078	19.9403	0.0515339	20.4837	0.0537272	19.8244	0.0545645	21.2338	0.0501326	20.1146	0.0545518	20.5999	0.0560251	21.5525	0.0506129
Plot Type	1	20.0745	0.0589482	21.7613	0.0521924	21.0195	0.0524217	20.3256	0.0526524	19.675	0.0528846	19.0639	0.0531182	18.4888	0.0533532	17.9465	0.0535897	17.4344	0.0538276	17.1455	0.0538654	17.1455	0.0537544	20.9919	0.0523333	20.2937	0.0541489	20.5443	0.0555709	20.9769	0.0637551	20.4555	0.0586568	20.5014	0.0518869	19.8896	0.0519839	20.4318	0.0540082	19.7697	0.0548359	21.1785	0.0512435	20.0633	0.0550662	20.547	0.0567429	21.4915	0.0514226
1st free col	55	19.5432	0.0560051	21.7597	0.0522072	21.0179	0.0524366	20.324	0.0526675	19.6735	0.0528998	19.0625	0.0531335	18.4874	0.0533687	17.9451	0.0536053	17.433	0.0538435	17.2934	0.0537929	17.2934	0.0536822	20.2989	0.0525635	20.2073	0.0544396	20.4584	0.0567818	20.8866	0.0659267	20.3642	0.0598548	20.4103	0.0529735	19.8073	0.0523986	20.3476	0.0542671	19.681	0.055086	21.0888	0.0522674	19.98	0.0555403	20.4612	0.0574045	21.3924	0.0521689
Sigma Level	1	19.5909	0.0494816	21.757	0.0522179	21.0153	0.0524475	20.3215	0.0526785	19.6711	0.0529109	19.0601	0.0531448	18.4851	0.0533801	17.9429	0.0536169	17.4309	0.0538551	17.4438	0.0537204	17.4438	0.0536101	19.6492	0.0527951	20.0909	0.0546944	20.3428	0.0578431	20.7651	0.0678301	20.2414	0.0609048	20.2878	0.053926	19.6966	0.0527621	20.2342	0.0544941	19.5616	0.0553053	20.968	0.0531649	19.868	0.0559559	20.3457	0.0579843	21.259	0.052823
Absolute Errs	FALSE	19.0668	0.0510659	21.7533	0.0522244	21.0118	0.052454	20.3181	0.0526851	19.6678	0.0529176	19.0569	0.0531516	18.482	0.053387	17.9399	0.0536239	17.4279	0.0538622	17.5968	0.0536482	17.5968	0.0535381	19.0389	0.0530281	19.9491	0.0549036	20.202	0.0587141	20.6171	0.0693923	20.0918	0.0617666	20.1384	0.0547077	19.5616	0.0530605	20.0961	0.0546803	19.4161	0.0554852	20.8209	0.0539014	19.7314	0.0562969	20.2049	0.0584601	21.0965	0.0533598
Symbol Type	1	19.5897	0.0534351	21.7489	0.0522262	21.0076	0.0524559	20.314	0.0526871	19.6638	0.0529196	19.0531	0.0531537	18.4782	0.0533891	17.9362	0.0536261	17.4244	0.0538645	17.7524	0.053576	17.7524	0.0534662	18.4644	0.0532626	19.7873	0.055059	20.0413	0.0593613	20.4482	0.070553	19.9211	0.0624069	19.9681	0.0552885	19.4076	0.0532821	19.9385	0.0548187	19.2501	0.0556189	20.653	0.0544487	19.5756	0.0565503	20.0444	0.0588137	20.9111	0.0537587
Inverse Plot	TRUE	18.8827	0.0542823	21.7439	0.0522233	21.0027	0.0524531	20.3093	0.0526842	19.6593	0.0529168	19.0486	0.0531509	18.4739	0.0533864	17.9321	0.0536234	17.4203	0.0538618	17.9107	0.053504	17.9107	0.0533945	17.9229	0.0534985	19.6118	0.0551546	19.8669	0.0597599	20.265	0.0712678	19.7358	0.0628012	19.7832	0.0556462	19.2405	0.0534186	19.7675	0.0549039	19.07	0.0557012	20.4708	0.0547857	19.4066	0.0567064	19.8701	0.0590315	20.7099	0.0540043
Color Plot	TRUE	20.2814	0.0489772	21.7384	0.0522159	20.9974	0.0524457	20.3042	0.0526768	19.6543	0.0529094	19.0438	0.0531434	18.4693	0.0533789	17.9276	0.0536158	17.4159	0.0538543	18.0718	0.0534321	18.0718	0.0533229	17.4114	0.053736	19.4292	0.055187	19.6856	0.0598944	20.0745	0.0715092	19.5432	0.0629344	19.5909	0.0557669	19.0668	0.0534647	19.5897	0.0549327	18.8827	0.055729	20.2814	0.0548995	19.2308	0.0567591	19.6889	0.059105	20.5006	0.0540872
3D plot	FALSE	19.2308	0.0540168	21.7328	0.0522042	20.9919	0.0524339	20.2989	0.052665	19.6492	0.0528975	19.0389	0.0531315	18.4644	0.0533669	17.9229	0.0536038	17.4114	0.0538422	18.2358	0.0533604	18.2358	0.0532515	IsoLine	IsoLine	19.2467	0.0551546	19.5043	0.0597599	19.8839	0.0712678	19.3505	0.0628012	19.3987	0.0556462	18.893	0.0534186	19.4119	0.0549039	18.6954	0.0557012	20.092	0.0547857	19.055	0.0567064	19.5077	0.0590315	20.2914	0.0540043
Linear	FALSE	19.6889	0.0552786	21.7271	0.0521887	20.9864	0.0524183	20.2936	0.0526493	19.644	0.0528817	19.0339	0.0531156	18.4596	0.053351	17.9181	0.0535878	17.4068	0.053826	18.4027	0.0532888	18.4027	0.0531802			19.0711	0.055059	19.3299	0.0593613	19.7007	0.070553	19.1653	0.0624069	19.2138	0.0552885	18.7259	0.0532821	19.241	0.0548187	18.5153	0.0556189	19.9098	0.0544487	18.886	0.0565503	19.3335	0.0588137	20.0902	0.0537587
Data Range	BS3:BW5,BS7:BW9,BS11:BW15,BS17:BW18	20.5006	0.0497708	21.7216	0.0521699	20.9812	0.0523994	20.2885	0.0526303	19.6391	0.0528626	19.0291	0.0530964	18.4549	0.0533316	17.9136	0.0535683	17.4024	0.0538064	18.5725	0.0532173	18.5725	0.053109			18.9094	0.0549036	19.1692	0.0587141	19.5318	0.0693923	18.9946	0.0617666	19.0434	0.0547077	18.572	0.0530605	19.0834	0.0546803	18.3493	0.0554852	19.7419	0.0539014	18.7302	0.0562969	19.1729	0.0584601	19.9048	0.0533598
Filled Symbols	TRUE	19.2767	0.051725	21.7166	0.0521487	20.9763	0.052378	20.2838	0.0526087	19.6345	0.0528409	19.0246	0.0530745	18.4506	0.0533096	17.9095	0.0535461	17.3983	0.0537841	18.7455	0.053146	18.7455	0.053038			18.7676	0.0546944	19.0284	0.0578431	19.3838	0.0678301	18.8449	0.0609048	18.8941	0.053926	18.437	0.0527621	18.9453	0.0544941	18.2038	0.0553053	19.5948	0.0531649	18.5936	0.0559559	19.0321	0.0579843	19.7423	0.052823
ConcAge	TRUE	IsoLine	IsoLine	21.7122	0.0521257	20.972	0.0523548	20.2796	0.0525854	19.6305	0.0528174	19.0208	0.0530508	18.4469	0.0532857	17.9058	0.0535221	17.3948	0.0537599	18.9216	0.0530747	18.9216	0.0529671			18.6512	0.0544396	18.9128	0.0567818	19.2623	0.0659267	18.7221	0.0598548	18.7715	0.0529735	18.3262	0.0523986	18.8319	0.0542671	18.0844	0.055086	19.474	0.0522674	18.4816	0.0555403	18.9166	0.0574045	19.6089	0.0521689
ConcSwap	TRUE			21.7086	0.0521019	20.9685	0.0523309	20.2763	0.0525613	19.6273	0.0527931	19.0176	0.0530263	18.4438	0.053261	17.9028	0.0534972	17.3919	0.0537348	19.101	0.0530037	19.101	0.0528963			18.5647	0.0541489	18.8269	0.0555709	19.1721	0.0637551	18.6309	0.0586568	18.6805	0.0518869	18.2439	0.0519839	18.7477	0.0540082	17.9957	0.0548359	19.3843	0.0512435	18.3983	0.0550662	18.8308	0.0567429	19.5098	0.0514226
1st Symbol-row	1			21.7059	0.0520782	20.9659	0.052307	20.2737	0.0525372	19.6248	0.0527688	19.0152	0.0530019	18.4415	0.0532364	17.9006	0.0534723	17.3897	0.0537098	19.2837	0.0529327	19.2837	0.0528257			18.5115	0.0538334	18.774	0.0542571	19.1165	0.0613987	18.5747	0.057357	18.6244	0.0507078	18.1932	0.0515339	18.6958	0.0537272	17.941	0.0545645	19.329	0.0501326	18.347	0.0545518	18.778	0.0560251	19.4487	0.0506129
				21.7042	0.0520555	20.9643	0.0522841	20.2722	0.0525141	19.6233	0.0527456	19.0138	0.0529784	18.4401	0.0532127	17.8992	0.0534485	17.3884	0.0536857	19.4698	0.0528619	19.4698	0.0527551			18.4935	0.0535054	18.7561	0.0528908	19.0977	0.0589482	18.5557	0.0560051	18.6054	0.0494816	18.1761	0.0510659	18.6783	0.0534351	17.9226	0.0542823	19.3103	0.0489772	18.3297	0.0540168	18.7601	0.0552786	19.4281	0.0497708
				21.7037	0.0520348	20.9638	0.0522632	20.2717	0.052493	19.6228	0.0527242	19.0133	0.0529569	18.4396	0.053191	17.8987	0.0534266	17.3879	0.0536636	19.6595	0.0527913	19.6595	0.0526848			18.5115	0.0531773	18.774	0.0515244	19.1165	0.0564977	18.5747	0.0546533	18.6244	0.0482554	18.1932	0.0505979	18.6958	0.0531429	17.941	0.054	19.329	0.0478218	18.347	0.0534818	18.778	0.0545322	19.4487	0.0489287
				21.7042	0.0520166	20.9643	0.0522449	20.2722	0.0524745	19.6233	0.0527056	19.0138	0.0529381	18.4401	0.053172	17.8992	0.0534074	17.3884	0.0536443	19.8529	0.0527207	19.8529	0.0526145			18.5647	0.0528618	18.8269	0.0502106	19.1721	0.0541413	18.6309	0.0533534	18.6805	0.0470763	18.2439	0.0501479	18.7477	0.0528619	17.9957	0.0537286	19.3843	0.0467108	18.3983	0.0529673	18.8308	0.0538144	19.5098	0.048119
				21.7059	0.0520019	20.9659	0.05223	20.2737	0.0524595	19.6248	0.0526904	19.0152	0.0529227	18.4415	0.0531565	17.9006	0.0533918	17.3897	0.0536285	20.0499	0.0526503	20.0499	0.0525444			18.6512	0.0525711	18.9128	0.0489997	19.2623	0.0519697	18.7221	0.0521555	18.7715	0.0459896	18.3262	0.0497332	18.8319	0.052603	18.0844	0.0534785	19.474	0.0456869	18.4816	0.0524932	18.9166	0.0531528	19.6089	0.0473728
				21.7086	0.0519911	20.9685	0.0522191	20.2763	0.0524484	19.6273	0.0526792	19.0176	0.0529114	18.4438	0.0531451	17.9028	0.0533802	17.3919	0.0536168	20.2509	0.05258	20.2509	0.0524744			18.7676	0.0523163	19.0284	0.0479384	19.3838	0.0500663	18.8449	0.0511054	18.8941	0.0450372	18.437	0.0493697	18.9453	0.052376	18.2038	0.0532592	19.5948	0.0447895	18.5936	0.0520777	19.0321	0.052573	19.7423	0.0467187
				21.7122	0.0519847	20.972	0.0522126	20.2796	0.0524418	19.6305	0.0526725	19.0208	0.0529046	18.4469	0.0531382	17.9058	0.0533732	17.3948	0.0536097	20.4558	0.0525099	20.4558	0.0524046			18.9094	0.0521072	19.1692	0.0470674	19.5318	0.0485041	18.9946	0.0502437	19.0434	0.0442555	18.572	0.0490714	19.0834	0.0521898	18.3493	0.0530793	19.7419	0.0440529	18.7302	0.0517366	19.1729	0.0520971	19.9048	0.0461819
				21.7166	0.0519829	20.9763	0.0522107	20.2838	0.0524399	19.6345	0.0526705	19.0246	0.0529026	18.4506	0.0531361	17.9095	0.053371	17.3983	0.0536074	20.6648	0.0524399	20.6648	0.0523348			19.0711	0.0519518	19.3299	0.0464202	19.7007	0.0473434	19.1653	0.0496034	19.2138	0.0436747	18.7259	0.0488497	19.241	0.0520514	18.5153	0.0529456	19.9098	0.0435057	18.886	0.0514832	19.3335	0.0517435	20.0902	0.045783
				21.7216	0.0519857	20.9812	0.0522135	20.2885	0.0524427	19.6391	0.0526733	19.0291	0.0529053	18.4549	0.0531388	17.9136	0.0533737	17.4024	0.0536101	20.878	0.05237	20.878	0.0522653			19.2467	0.0518561	19.5043	0.0460217	19.8839	0.0466286	19.3505	0.0492091	19.3987	0.043317	18.893	0.0487132	19.4119	0.0519662	18.6954	0.0528633	20.092	0.0431686	19.055	0.0513271	19.5077	0.0515258	20.2914	0.0455373
				21.7271	0.0519931	20.9864	0.0522209	20.2936	0.0524501	19.644	0.0526808	19.0339	0.0529128	18.4596	0.0531463	17.9181	0.0533813	17.4068	0.0536176	21.0956	0.0523003	21.0956	0.0521958			19.4292	0.0518238	19.6856	0.0458871	20.0745	0.0463872	19.5432	0.0490759	19.5909	0.0431962	19.0668	0.0486671	19.5897	0.0519374	18.8827	0.0528355	20.2814	0.0430548	19.2308	0.0512745	19.6889	0.0514523	20.5006	0.0454544
				21.7328	0.0520048	20.9919	0.0522327	20.2989	0.0524619	19.6492	0.0526926	19.0389	0.0529247	18.4644	0.0531583	17.9229	0.0533933	17.4114	0.0536297	21.3176	0.0522306	21.3176	0.0521265			19.6118	0.0518561	19.8669	0.0460217	20.265	0.0466286	19.7358	0.0492091	19.7832	0.043317	19.2405	0.0487132	19.7675	0.0519662	19.07	0.0528633	20.4708	0.0431686	19.4066	0.0513271	19.8701	0.0515258	20.7099	0.0455373
				21.7384	0.0520204	20.9974	0.0522483	20.3042	0.0524777	19.6543	0.0527084	19.0438	0.0529406	18.4693	0.0531743	17.9276	0.0534093	17.4159	0.0536459	21.5443	0.0521612	21.5443	0.0520573			19.7873	0.0519518	20.0413	0.0464202	20.4482	0.0473434	19.9211	0.0496034	19.9681	0.0436747	19.4076	0.0488497	19.9385	0.0520514	19.2501	0.0529456	20.653	0.0435057	19.5756	0.0514832	20.0444	0.0517435	20.9111	0.045783
				21.7439	0.0520391	21.0027	0.0522672	20.3093	0.0524967	19.6593	0.0527275	19.0486	0.0529599	18.4739	0.0531936	17.9321	0.0534288	17.4203	0.0536655	21.7757	0.0520918	21.7757	0.0519882			19.9491	0.0521072	20.202	0.0470674	20.6171	0.0485041	20.0918	0.0502437	20.1384	0.0442555	19.5616	0.0490714	20.0961	0.0521898	19.4161	0.0530793	20.8209	0.0440529	19.7314	0.0517366	20.2049	0.0520971	21.0965	0.0461819
				21.7489	0.0520604	21.0076	0.0522886	20.314	0.0525182	19.6638	0.0527493	19.0531	0.0529817	18.4782	0.0532156	17.9362	0.053451	17.4244	0.0536878	22.012	0.0520226	22.012	0.0519193			20.0909	0.0523163	20.3428	0.0479384	20.7651	0.0500663	20.2414	0.0511054	20.2878	0.0450372	19.6966	0.0493697	20.2342	0.052376	19.5616	0.0532592	20.968	0.0447895	19.868	0.0520777	20.3457	0.052573	21.259	0.0467187
				21.7533	0.0520834	21.0118	0.0523117	20.3181	0.0525415	19.6678	0.0527727	19.0569	0.0530054	18.482	0.0532395	17.9399	0.053475	17.4279	0.053712	22.2534	0.0519535	22.2534	0.0518504			20.2073	0.0525711	20.4584	0.0489997	20.8866	0.0519697	20.3642	0.0521555	20.4103	0.0459896	19.8073	0.0497332	20.3476	0.052603	19.681	0.0534785	21.0888	0.0456869	19.98	0.0524932	20.4612	0.0531528	21.3924	0.0473728
				21.757	0.0521072	21.0153	0.0523357	20.3215	0.0525657	19.6711	0.0527971	19.0601	0.0530299	18.4851	0.0532642	17.9429	0.0534999	17.4309	0.0537371	22.5	0.0518845	22.5	0.0517818			20.2937	0.0528618	20.5443	0.0502106	20.9769	0.0541413	20.4555	0.0533534	20.5014	0.0470763	19.8896	0.0501479	20.4318	0.0528619	19.7697	0.0537286	21.1785	0.0467108	20.0633	0.0529673	20.547	0.0538144	21.4915	0.048119
				21.7597	0.0521308	21.0179	0.0523596	20.324	0.0525898	19.6735	0.0528213	19.0625	0.0530544	18.4874	0.0532888	17.9451	0.0535248	17.433	0.0537621	22.5	0.0518845	22.5	0.0517818			20.347	0.0531773	20.5972	0.0515244	21.0324	0.0564977	20.5117	0.0546533	20.5575	0.0482554	19.9403	0.0505979	20.4837	0.0531429	19.8244	0.054	21.2338	0.0478218	20.1146	0.0534818	20.5999	0.0545322	21.5525	0.0489287
				21.7613	0.0521535	21.0195	0.0523825	20.3256	0.0526128	19.675	0.0528446	19.0639	0.0530778	18.4888	0.0533125	17.9465	0.0535486	17.4344	0.0537862	IsoLine	IsoLine	22.5	0.0519872			20.365	0.0535054	20.6151	0.0528908	21.0512	0.0589482	20.5306	0.0560051	20.5764	0.0494816	19.9574	0.0510659	20.5012	0.0534351	19.8428	0.0542823	21.2524	0.0489772	20.1319	0.0540168	20.6177	0.0552786	21.5731	0.0497708
				21.7619	0.0521743	21.0201	0.0524034	20.3261	0.052634	19.6756	0.0528659	19.0644	0.0530994	18.4893	0.0533342	17.947	0.0535705	17.4348	0.0538083			22.5	0.0519872			ErrEll	ErrEll	ErrEll	ErrEll	ErrEll	ErrEll	ErrEll	ErrEll	ErrEll	ErrEll	ErrEll	ErrEll	ErrEll	ErrEll	ErrEll	ErrEll	ErrEll	ErrEll	ErrEll	ErrEll	ErrEll	ErrEll	ErrEll	ErrEll
				ConcTikEll	ConcTikEll	ConcTikEll	ConcTikEll	ConcTikEll	ConcTikEll	ConcTikEll	ConcTikEll	ConcTikEll	ConcTikEll	ConcTikEll	ConcTikEll	ConcTikEll	ConcTikEll	ConcTikEll	ConcTikEll			22.2534	0.0520565
																						22.012	0.0521259
																						21.7757	0.0521954
																						21.5443	0.052265
																						21.3176	0.0523348
																						21.0956	0.0524047
																						20.878	0.0524748
																						20.6648	0.0525449
																						20.4558	0.0526152
																						20.2509	0.0526857
																						20.0499	0.0527562
																						19.8529	0.0528269
																						19.6595	0.0528978
																						19.4698	0.0529687
																						19.2837	0.0530398
																						19.101	0.0531111
																						18.9216	0.0531824
																						18.7455	0.0532539
																						18.5725	0.0533256
																						18.4027	0.0533973
																						18.2358	0.0534692
																						18.0718	0.0535413
																						17.9107	0.0536135
																						17.7524	0.0536858
																						17.5968	0.0537582
																						17.4438	0.0538308
																						17.2934	0.0539035
																						17.1455	0.0539764
																						17	0.0540494
																						17	0.0540494
																						17	0.0538268
																						ConcBand	ConcBand
[truncated: 4 more columns]

## Sheet: PlotDat9
Source sheet	Sheet1	0.508726	0.0676802	0.282745	0.04	0.266635	0.0379317	0.551078	0.0714755	0.556193	0.0720014	0.635673	0.0634013	0.39523	0.054128	0.559796	0.0684592	0.542282	0.0695185	0.52746	0.0702435	0.395453	0.0535038	0.540067	0.0652499	0.551628	0.0702241	0.550205	0.0704112	0.555499	0.0717991	0.581818	0.0674829	0.389334	0.0513313	0.673989	0.0629939	0.553802	0.0727217	0.381384	0.0522026	0.545424	0.0681991	0.406481	0.053897	0.397266	0.0537822	0.663843	0.0548213
Plot name	Concordia5	0.524117	0.0694024	0.282745	0.04	0.291832	0.0411569	0.550218	0.071915	0.555544	0.0723531	0.634736	0.0638017	0.394889	0.0542568	0.558888	0.0688299	0.541546	0.0699267	0.526919	0.0705497	0.395201	0.053625	0.539213	0.0657037	0.550999	0.0705679	0.549776	0.0706579	0.554908	0.0720831	0.580978	0.0677335	0.389081	0.0514662	0.673161	0.0633103	0.55319	0.0730548	0.38106	0.0523177	0.544714	0.0685572	0.406171	0.0540672	0.396913	0.0539242	0.661592	0.0551516
Plot Type	1	0.588441	0.0604034	0.293388	0.0413543	0.317529	0.0443921	0.547764	0.0721917	0.553688	0.0725915	0.63202	0.0640715	0.393916	0.0543062	0.556212	0.0691591	0.539434	0.0702121	0.525372	0.0707622	0.394482	0.0536941	0.536715	0.0660825	0.549196	0.0708074	0.548539	0.0708446	0.553221	0.0722519	0.578495	0.0679615	0.388357	0.0515551	0.670753	0.0635125	0.551441	0.0732787	0.380135	0.0523564	0.542634	0.0688639	0.405285	0.0541824	0.395908	0.053987	0.654927	0.0554592
1st free col	57	0.378457	0.0521946	0.304118	0.0427104	0.343738	0.0476374	0.54381	0.0722951	0.550695	0.0727072	0.62763	0.0642004	0.392349	0.0542746	0.551871	0.0694343	0.536028	0.0703637	0.522879	0.0708728	0.393324	0.0537083	0.532671	0.0663716	0.546287	0.0709334	0.546541	0.0709641	0.550503	0.072299	0.574463	0.0681579	0.387191	0.0515945	0.666859	0.0635926	0.548622	0.0733847	0.378646	0.0523174	0.539261	0.0691074	0.403857	0.054238	0.394289	0.0539681	0.644105	0.0557325
Sigma Level	1	0.512868	0.0677512	0.314938	0.0440683	0.370468	0.0508927	0.538507	0.0722211	0.54668	0.072696	0.621734	0.0641833	0.390248	0.0541629	0.54603	0.0696447	0.53146	0.0703758	0.519536	0.0708773	0.391773	0.0536671	0.527235	0.0665601	0.542386	0.0709412	0.543858	0.0710119	0.546858	0.0722226	0.569039	0.0683153	0.385627	0.051583	0.661628	0.0635476	0.544842	0.0733687	0.376649	0.052202	0.534728	0.0692785	0.401942	0.0542319	0.392118	0.0538682	0.62954	0.0559607
Absolute Errs	FALSE	0.505769	0.0667312	0.325847	0.0454279	0.397729	0.0541582	0.53206	0.0719726	0.541799	0.0725582	0.614558	0.0640209	0.387695	0.0539757	0.538915	0.0697824	0.525905	0.0702478	0.515471	0.0707755	0.389887	0.0535721	0.520616	0.0666406	0.537641	0.0708304	0.540595	0.070986	0.542425	0.0720257	0.56243	0.0684275	0.383726	0.051521	0.655261	0.0633791	0.540245	0.0732314	0.374221	0.0520148	0.529206	0.0693705	0.399613	0.0541645	0.38948	0.0536913	0.611793	0.0561353
Symbol Type	1	0.500749	0.0681116	0.336847	0.0467893	0.425533	0.0574338	0.524716	0.0715591	0.536238	0.0722991	0.606378	0.0637196	0.384786	0.05372	0.530799	0.069842	0.519575	0.0699846	0.510839	0.0705714	0.387738	0.053427	0.51307	0.0666101	0.532235	0.0706052	0.536876	0.0708876	0.537377	0.0717157	0.55489	0.0684903	0.38156	0.0514108	0.648003	0.0630937	0.535008	0.072978	0.371455	0.0517629	0.522909	0.0693799	0.39696	0.0540382	0.386474	0.053444	0.591546	0.0562494
Inverse Plot	FALSE	0.383067	0.0522667	0.347938	0.0481525	0.45389	0.0607196	0.516757	0.0709966	0.530211	0.0719287	0.597509	0.0632908	0.381633	0.0534057	0.521994	0.0698213	0.512715	0.0695964	0.505821	0.0702727	0.385411	0.0532372	0.504885	0.0664698	0.526375	0.0702743	0.532845	0.0707203	0.531905	0.0713047	0.54671	0.0685013	0.379213	0.0512568	0.640133	0.0627024	0.529334	0.0726183	0.368459	0.051456	0.516079	0.0693063	0.394085	0.0538579	0.383218	0.0531358	0.569577	0.0562987
Color Plot	TRUE	0.496461	0.0637513	0.359121	0.0495174	0.482812	0.0640155	0.50849	0.0703067	0.52395	0.0714612	0.588292	0.062751	0.378359	0.0530448	0.512838	0.069721	0.505588	0.0690981	0.500607	0.069891	0.382993	0.0530102	0.496376	0.0662249	0.520288	0.0698505	0.528656	0.0704905	0.526222	0.0708083	0.538202	0.0684601	0.376775	0.0510647	0.631953	0.0622201	0.523439	0.0721661	0.365346	0.0511058	0.508978	0.0691526	0.391098	0.0536306	0.379835	0.0527788	0.54673	0.0562813
3D plot	FALSE	0.52044	0.0678551	0.370397	0.0508841	0.512308	0.0673218	0.500232	0.0695158	0.517696	0.0709146	0.57908	0.0621211	0.375089	0.0526513	0.503683	0.069545	0.498469	0.0685089	0.495399	0.0694409	0.380578	0.0527545	0.48787	0.065885	0.514206	0.06935	0.52447	0.0702072	0.520544	0.0702457	0.529696	0.0683682	0.374339	0.050842	0.623777	0.0616654	0.51755	0.0716388	0.362236	0.050726	0.501879	0.0689246	0.388115	0.053365	0.376456	0.0523864	0.523884	0.0561979
Linear	FALSE	0.528741	0.0690964	0.381766	0.0522526	0.542391	0.0706383	0.492301	0.0686543	0.511688	0.0703099	0.570228	0.0614251	0.371948	0.0522402	0.494882	0.0693001	0.491629	0.0678513	0.490396	0.0689397	0.378259	0.0524801	0.479695	0.0654632	0.508364	0.068792	0.520448	0.0698813	0.515091	0.0696385	0.521516	0.0682291	0.372	0.0505973	0.615921	0.0610596	0.511893	0.0710566	0.35925	0.0503309	0.495055	0.0686312	0.385249	0.0530713	0.373211	0.0519739	0.501915	0.0560516
Data Range	BK159:BN182	0.526382	0.0690851	0.39323	0.0536229	0.573073	0.0739651	0.485	0.0677555	0.506158	0.0696703	0.562077	0.0606898	0.369057	0.0518274	0.486771	0.0689957	0.485333	0.0671507	0.485791	0.0684067	0.376124	0.0521976	0.472164	0.0649755	0.502986	0.0681981	0.516745	0.0695251	0.510072	0.0690101	0.513979	0.0680482	0.369847	0.05034	0.608685	0.060426	0.506687	0.0704419	0.356501	0.0499359	0.488768	0.0682836	0.382612	0.0527608	0.370224	0.0515571	0.481669	0.0558481
Filled Symbols	TRUE	0.538213	0.0671415	0.404789	0.054995	0.604365	0.0773023	0.478612	0.0668537	0.501318	0.0690204	0.554938	0.0599436	0.366528	0.0514287	0.479664	0.0686434	0.479823	0.0664339	0.481761	0.0678623	0.374256	0.0519176	0.465567	0.0644408	0.498279	0.0675909	0.513503	0.0691525	0.50568	0.0683845	0.507372	0.0678325	0.367962	0.0500799	0.602348	0.0597889	0.502131	0.0698183	0.354096	0.0495561	0.483259	0.0678951	0.380303	0.0524454	0.367611	0.0511519	0.463923	0.0555952
ConcAge	FALSE	0.376843	0.0502684	0.416443	0.0563688	IsoLine	IsoLine	0.47338	0.0659837	0.497354	0.0683852	0.549086	0.059215	0.364456	0.0510594	0.473832	0.0682569	0.475309	0.0657286	0.478461	0.0673275	0.372727	0.0516511	0.460157	0.0638796	0.494423	0.066994	0.510847	0.0687777	0.502083	0.0677859	0.501951	0.0675902	0.366419	0.049827	0.597153	0.0591729	0.498399	0.0692099	0.352126	0.0492062	0.478741	0.0674807	0.378413	0.0521372	0.365471	0.0507741	0.449359	0.0553026
ConcSwap	TRUE	0.632072	0.0603361	0.428195	0.0577445			0.469507	0.0651789	0.494419	0.067789	0.544747	0.0585321	0.362923	0.0507337	0.4695	0.0678509	0.471966	0.0650618	0.476017	0.0668229	0.371595	0.0514083	0.456142	0.0633134	0.491568	0.0664301	0.508878	0.0684152	0.499421	0.0672372	0.497923	0.0673307	0.365276	0.0495911	0.5933	0.0586016	0.495637	0.0686399	0.350668	0.0488994	0.475387	0.0670564	0.377013	0.0518481	0.363887	0.050438	0.438538	0.0549816
1st Symbol-row	1	0.523601	0.0702112	0.440044	0.0591219			0.467141	0.0644703	0.492625	0.0672549	0.542088	0.0579211	0.361987	0.0504642	0.466835	0.0674411	0.469922	0.0644592	0.474524	0.0663678	0.370905	0.0511984	0.453676	0.0627641	0.489821	0.0659209	0.507672	0.0680788	0.497794	0.0667595	0.495444	0.0670639	0.364578	0.0493813	0.590937	0.0580969	0.493949	0.0681303	0.349778	0.0486477	0.473325	0.0666384	0.376158	0.0515892	0.36292	0.0501566	0.431875	0.0546445
		0.365436	0.0503317	0.451991	0.0605011			0.466373	0.0638849	0.492041	0.0668033	0.541209	0.0574054	0.361684	0.0502612	0.46594	0.0670432	0.469256	0.0639438	0.474039	0.0659797	0.370681	0.0510296	0.452855	0.0622528	0.489252	0.0654861	0.507277	0.0677815	0.497266	0.0663712	0.494608	0.0668001	0.364351	0.0492055	0.590155	0.0576783	0.4934	0.0677007	0.349489	0.0484607	0.472636	0.0662427	0.37588	0.0513704	0.362607	0.0499407	0.429625	0.0543043
		0.50903	0.0672209	0.464037	0.0618822			0.467233	0.0634455	0.49269	0.0664516	0.542146	0.057005	0.362026	0.0501325	0.466847	0.0666725	0.469993	0.0635356	0.47458	0.0656735	0.370933	0.0509083	0.453709	0.061799	0.48988	0.0651424	0.507706	0.0675348	0.497856	0.0660871	0.495448	0.0665495	0.364605	0.0490706	0.590984	0.0573619	0.494012	0.0673676	0.349813	0.0483457	0.473346	0.0658847	0.37619	0.0512002	0.36296	0.0497987	0.431876	0.053974
		0.391181	0.0526337	0.476183	0.063265			0.469687	0.0631687	0.494546	0.0662133	0.544862	0.0567352	0.362998	0.050083	0.469523	0.0663432	0.472104	0.0632502	0.476126	0.065461	0.371652	0.0508393	0.456207	0.0614202	0.491684	0.0649029	0.508943	0.0673481	0.499543	0.0659183	0.497931	0.0663215	0.365328	0.0489817	0.593391	0.0571597	0.495761	0.0671437	0.350738	0.0483069	0.475426	0.065578	0.377076	0.0510851	0.363965	0.0497359	0.438541	0.0536663
		0.379937	0.0518614	0.488431	0.0646496			0.473642	0.0630654	0.497539	0.0660975	0.549252	0.0566064	0.364565	0.0501147	0.473865	0.0660681	0.47551	0.0630986	0.478619	0.0653504	0.37281	0.050825	0.460251	0.0611311	0.494592	0.0647768	0.510942	0.0672286	0.502262	0.0658712	0.501962	0.0661251	0.366494	0.0489422	0.597286	0.0570796	0.49858	0.0670377	0.352227	0.0483459	0.478799	0.0653345	0.378505	0.0510295	0.365584	0.0497548	0.449364	0.0533931
		0.546734	0.0545628	0.500779	0.066036			0.478944	0.0631394	0.501554	0.0661087	0.555148	0.0566235	0.366666	0.0502263	0.479706	0.0658577	0.480078	0.0630865	0.481962	0.0653459	0.374361	0.0508662	0.465687	0.0609426	0.498493	0.0647691	0.513624	0.0671808	0.505907	0.0659476	0.507387	0.0659677	0.368058	0.0489537	0.602517	0.0571246	0.502361	0.0670537	0.354224	0.0484613	0.483332	0.0651634	0.38042	0.0510355	0.367755	0.0498546	0.463928	0.0531648
		0.39227	0.0522223	0.51323	0.0674243			0.485392	0.0633879	0.506435	0.0662466	0.562324	0.0567858	0.36922	0.0504135	0.486821	0.06572	0.485634	0.0632146	0.486028	0.0654477	0.376247	0.0509612	0.472305	0.0608621	0.503238	0.0648799	0.516887	0.0672067	0.51034	0.0661446	0.513996	0.0658555	0.369959	0.0490158	0.608883	0.057293	0.506957	0.067191	0.356652	0.0486485	0.488854	0.0650714	0.382749	0.051103	0.370393	0.0500316	0.481675	0.0529903
		0.513734	0.0693055	0.525785	0.0688143			0.492736	0.0638013	0.511996	0.0665056	0.570504	0.0570872	0.372129	0.0506692	0.494937	0.0656604	0.491963	0.0634777	0.490659	0.0656518	0.378396	0.0511064	0.479852	0.0608926	0.508644	0.0651051	0.520606	0.0673051	0.515388	0.0664545	0.521535	0.0657926	0.372125	0.0491259	0.616141	0.0575784	0.512194	0.0674444	0.359418	0.0489005	0.495151	0.065062	0.385402	0.0512293	0.373399	0.0502789	0.501922	0.0528761
		0.616648	0.065553	0.538443	0.0702062			0.500694	0.0643638	0.518023	0.066876	0.579373	0.057516	0.375281	0.0509835	0.503742	0.0656811	0.498823	0.0638659	0.495677	0.0659505	0.380724	0.0512962	0.488037	0.0610329	0.514504	0.0654359	0.524637	0.0674725	0.52086	0.0668656	0.529716	0.0657817	0.374472	0.04928	0.624012	0.0579698	0.517868	0.0678041	0.362414	0.0492074	0.501981	0.0651356	0.388276	0.0514095	0.376656	0.050587	0.523891	0.0528268
		IsoLine	IsoLine	0.551207	0.0715998			0.508961	0.0650538	0.524284	0.0673435	0.58859	0.0580557	0.378555	0.0513444	0.512898	0.0657814	0.50595	0.0643642	0.500891	0.0663322	0.383141	0.0515232	0.496546	0.0612778	0.520591	0.0658597	0.528826	0.0677022	0.526543	0.0673619	0.538223	0.0658229	0.37691	0.0494721	0.632192	0.0584521	0.523764	0.0682563	0.365527	0.0495575	0.509082	0.0652893	0.391263	0.0516368	0.380038	0.0509441	0.546738	0.0528442
				0.564076	0.0729953			0.517219	0.0658447	0.530538	0.0678902	0.597802	0.0586857	0.381826	0.0517379	0.522052	0.0659573	0.51307	0.0649535	0.506099	0.0667824	0.385556	0.0517788	0.505051	0.0616176	0.526673	0.0663602	0.533012	0.0679855	0.53222	0.0679245	0.54673	0.0659148	0.379346	0.0496947	0.640367	0.0590068	0.529652	0.0687836	0.368637	0.0499374	0.516181	0.0655173	0.394246	0.0519025	0.383417	0.0513365	0.569585	0.0529277
				0.577053	0.0743926			0.525151	0.0667061	0.536546	0.0684949	0.606653	0.0593817	0.384967	0.052149	0.530854	0.0662022	0.519909	0.065611	0.511102	0.0672835	0.387876	0.0520532	0.513227	0.0620395	0.532515	0.0669182	0.537034	0.0683115	0.537673	0.0685317	0.554909	0.0660539	0.381686	0.0499394	0.648224	0.0596126	0.535309	0.0693658	0.371623	0.0503324	0.523005	0.0658107	0.397112	0.0521962	0.386662	0.051749	0.591553	0.053074
				0.590137	0.0757917			0.532451	0.067605	0.542076	0.0691345	0.614805	0.0601169	0.387857	0.0525618	0.538964	0.0665067	0.526205	0.0663117	0.515707	0.0678166	0.39001	0.0523358	0.520758	0.0625272	0.537893	0.0675122	0.540737	0.0686676	0.542692	0.0691601	0.562447	0.0662348	0.383839	0.0501968	0.655459	0.0602462	0.540515	0.0699805	0.374372	0.0507274	0.529292	0.0661583	0.39975	0.0525067	0.389649	0.0521658	0.6118	0.0532775
				0.603329	0.0771927			0.53884	0.0685067	0.546916	0.0697844	0.621944	0.0608632	0.390387	0.0529606	0.546072	0.066859	0.531716	0.0670284	0.519737	0.0683609	0.391878	0.0526157	0.527355	0.0630619	0.5426	0.0681193	0.543979	0.0690402	0.547085	0.0697857	0.569053	0.0664505	0.385723	0.0504569	0.661797	0.0608832	0.545071	0.070604	0.376777	0.0511072	0.534801	0.0665468	0.402058	0.0528221	0.392262	0.052571	0.629545	0.0535304
				0.616631	0.0785954			0.544071	0.0693767	0.55088	0.0704196	0.627796	0.0615918	0.392458	0.0533298	0.551904	0.0672455	0.536229	0.0677337	0.523037	0.0688957	0.393407	0.0528822	0.532765	0.0636231	0.546456	0.0687163	0.546636	0.069415	0.550681	0.0703843	0.574475	0.0666928	0.387266	0.0507097	0.666991	0.0614993	0.548803	0.0712125	0.378747	0.0514572	0.539319	0.0669611	0.403948	0.0531303	0.394402	0.0529488	0.644109	0.0538229
				0.630043	0.08			0.547944	0.0701815	0.553815	0.0710157	0.632134	0.0622747	0.393991	0.0536555	0.556235	0.0676515	0.539572	0.0684005	0.525481	0.0694003	0.394539	0.0531251	0.53678	0.0641893	0.549312	0.0692802	0.548604	0.0697775	0.553344	0.0709331	0.578502	0.0669523	0.388409	0.0509456	0.670844	0.0620706	0.551565	0.0717824	0.380205	0.0517639	0.542673	0.0673855	0.405348	0.0534194	0.395986	0.0532849	0.65493	0.0541439
				0.630043	0.08			0.55031	0.0708902	0.555609	0.0715498	0.634794	0.0628857	0.394927	0.053925	0.5589	0.0680613	0.541616	0.0690031	0.526974	0.0698554	0.39523	0.053335	0.539246	0.0647386	0.551058	0.0697893	0.54981	0.0701139	0.554971	0.0714108	0.580982	0.0672191	0.389107	0.0511555	0.673207	0.0625752	0.553254	0.072292	0.381095	0.0520156	0.544735	0.0678035	0.406203	0.0536783	0.396953	0.0535663	0.661594	0.054481
				IsoLine	IsoLine			0.551078	0.0714755	0.556193	0.0720014	0.635673	0.0634013	0.39523	0.054128	0.559796	0.0684592	0.542282	0.0695185	0.52746	0.0702435	0.395453	0.0535038	0.540067	0.0652499	0.551628	0.0702241	0.550205	0.0704112	0.555499	0.0717991	0.581818	0.0674829	0.389334	0.0513313	0.673989	0.0629939	0.553802	0.0727217	0.381384	0.0522026	0.545424	0.0681991	0.406481	0.053897	0.397266	0.0537822	0.663843	0.0548213
								ErrEll	ErrEll	ErrEll	ErrEll	ErrEll	ErrEll	ErrEll	ErrEll	ErrEll	ErrEll	ErrEll	ErrEll	ErrEll	ErrEll	ErrEll	ErrEll	ErrEll	ErrEll	ErrEll	ErrEll	ErrEll	ErrEll	ErrEll	ErrEll	ErrEll	ErrEll	ErrEll	ErrEll	ErrEll	ErrEll	ErrEll	ErrEll	ErrEll	ErrEll	ErrEll	ErrEll	ErrEll	ErrEll	ErrEll	ErrEll	ErrEll	ErrEll
[truncated: 6 more columns]

## Sheet: Table S2  All SHRIMP spot data
	Table S2. Isotopic data for all analyses by secondary ionization mass spectrometry on the U.S. Geological Survey/Stanford sensitive high-resolution ion microprobe-reverse geometry (SHRIMP-RG). Data were collected during three analytical sessions. Sample DW11 was analyzed on 10/19/2018, samples M19-02-28A, M19-02-28B, and M19-02-28C were analyzed on 6/11/2019, and samples Jack-1 and JR1-1 were ana…																																		Carter, M.W., McAleer, R.J., Holm-Denoma, C.S., Occhi, M.E., Owens, B.E., and Vazquez, J.A., 2023, Redefinition of the Petersburg batholith and implications for crustal inheritance in the Dinwiddie terrane, Virginia, USA: Geosphere, v. 19, https://doi.org/10.1130/GES02546.1
	Spot namei	Date/Time	Hours	204Pb /206Pb	207Pb /206Pb	Percent common 206Pbii	U (ppm)	Th (ppm)	206Pb* (ppm)iii	232Th /238U	206/238U age (Ma)iv	Abs err (2σ)	207/206Pb age (Ma)v	Abs err (2σ)	Percent discord.vi	Total 238 /206vii	% err (2σ)	Total 207 /206vii	% err (2σ)	4corr 238 /206*viii	% err (2σ)	4corr 207* /206* viii	% err (2σ)	4corr 207* /235ix	% err (2σ)	4corr 206* /238ix	% err (2σ)	err corr	Typex	Notes		Summary
	DW11_1.1	2018-10-19, 16:59	16.167	5.02738e-05	0.0542408	0.167364	962.706	306.713	42.5306	0.329108	323.294	12.5276	349.304	58.0539	1.00536	19.4114	3.93406	0.0542408	2.1369	19.4292	3.93512	0.0535054	2.56796	0.379702	4.69889	0.0514689	3.93512	0.837458	R	Fig. 11e		Igneous Cores/Rims
	DW11_2.1	2018-10-19, 17:14	16.417	0.00256319	0.0904179	4.6775	1187.77	447.912	51.8239	0.389548	319.389	11.9515	323.125	245.738	0.176973	18.7668	3.79632	0.0904179	1.58707	19.6856	3.85791	0.0528908	10.8196	0.370452	11.4868	0.0507986	3.85791	0.335856	C			Weighted Average age (2σ)
	DW11_3.1	2018-10-19, 17:31	16.7	0.00272587	0.0985564	5.7166	508.06	292.186	21.5688	0.59408	310.97	12.0392	564.236	379.232	9.21241	19.0774	3.8472	0.0985564	6.20791	20.0745	3.97563	0.0589482	17.4107	0.404882	17.8588	0.0498145	3.97563	0.222614	C	Fig. 11e		320.5±3.5 Ma
	DW11_4.1	2018-10-19, 17:45	16.933	0.00556436	0.143752	11.583	1269.18	522.908	41.5341	0.425601	241.025	9.09975	719.04	462.712	17.2186	23.2085	3.78991	0.143752	2.40631	25.8449	4.14648	0.0633489	21.7964	0.33796	22.1873	0.0386924	4.14648	0.186885	C	Fig. 11e, High common Pb		MSWD: 1.3, p = 0.2, n = 13
	DW11_5.1	2018-10-19, 18:16	17.45	0.000798543	0.0676512	1.84315	1282.65	569.506	56.1546	0.458661	320.453	13.1198	451.605	224.481	4.85435	19.259	4.11341	0.0676512	7.15029	19.5432	4.12846	0.0560051	10.1093	0.395124	10.9198	0.0511687	4.12846	0.378072	C
	DW11_6.1	2018-10-19, 18:31	17.7	0.000833409	0.0617351	1.1022	413.751	185.089	18.2181	0.462106	322.247	12.9237	169.697	242.365	-5.77611	19.2937	4.06746	0.0617351	3.01529	19.5909	4.1102	0.0494816	10.3788	0.348249	11.1631	0.051044	4.1102	0.368196	C			Total analyses = 16
	DW11_7.1	2018-10-19, 18:46	17.95	0.000177251	0.0536669	0.0755698	830.462	167.223	37.5068	0.208006	330.325	12.4016	242.803	88.4424	-3.26198	19.0053	3.81217	0.0536669	2.32856	19.0668	3.81675	0.0510659	3.83824	0.369279	5.41291	0.0524473	3.81675	0.705119	R	Fig. 11e		High common Pb = 3
	DW11_8.1	2018-10-19, 19:01	18.2	0.0150286	0.266197	26.806	975.93	723.534	34.2002	0.765844	257.764	20.3909	-134.122	3963.1	-15.6413	17.9415	6.92165	0.266197	8.89492	24.7508	10.3038	0.0436032	160.226	0.242902	160.557	0.0404028	10.3038	0.0641758	C	High common Pb		13/16 included in age
	DW11_9.1	2018-10-19, 19:31	18.7	2.37437e-05	0.0537824	0.117855	1040.44	430.139	45.5885	0.427065	320.713	12.0087	346.331	51.7994	0.991616	19.5813	3.80102	0.0537824	2.0828	19.5897	3.80151	0.0534351	2.29009	0.376096	4.43801	0.0510471	3.80151	0.856579	C	Fig. 11e
	DW11_9.2	2018-10-19, 19:46	18.95	-2.23538e-05	0.0539555	0.106025	1053.14	465.384	47.8384	0.456485	332.184	13.5851	381.8	48.9499	1.87266	18.8904	4.15417	0.0539555	2.01757	18.8827	4.15457	0.0542823	2.1777	0.396365	4.69072	0.0529585	4.15457	0.8857	C	Fig. 11e
	DW11_10.1	2018-10-19, 20:01	19.2	0.000678134	0.058954	0.787502	404.092	192.695	17.1926	0.492596	311.635	11.913	145.717	231.74	-6.31711	20.0308	3.87377	0.058954	3.33718	20.2814	3.91209	0.0489772	9.88012	0.332964	10.6264	0.0493063	3.91209	0.368147	C
	DW11_11.1	2018-10-19, 20:17	19.467	0.000206467	0.0570354	0.505788	693.853	256.267	30.9525	0.381527	326.372	12.2907	370.768	93.4219	1.68393	19.1586	3.82236	0.0570354	2.44531	19.2308	3.82856	0.0540168	4.14813	0.387286	5.64489	0.0519999	3.82856	0.678234	C	Fig. 11e
	DW11_12.1	2018-10-19, 20:47	19.967	0.000360159	0.060536	0.964438	549.319	199.822	23.8916	0.375767	318.402	12.0563	422.539	126.226	3.87885	19.5598	3.84036	0.060536	2.73181	19.6889	3.85453	0.0552786	5.65579	0.387112	6.84436	0.05079	3.85453	0.563168	C
	DW11_13.1	2018-10-19, 21:02	20.217	0.00471588	0.121857	8.68588	423.632	413.899	16.7445	1.00927	290.004	12.0342	319.38	644.863	1.14253	19.8448	4.08557	0.121857	6.09949	21.7141	4.37638	0.0528037	28.3736	0.335292	28.7091	0.046053	4.37638	0.152438	C	High common Pb
	DW11_14.1	2018-10-19, 21:16	20.45	0.000470187	0.0566815	0.515178	554.372	278.857	23.3089	0.519614	308.055	12.9321	183.291	165.063	-4.72135	20.3249	4.25707	0.0566815	2.88337	20.5006	4.27459	0.0497708	7.08618	0.334741	8.27563	0.048779	4.27459	0.516527	C	Fig. 11e
	DW11_15.1	2018-10-19, 21:31	20.7	0.000217421	0.0549128	0.241504	458.542	204.367	20.465	0.460397	326.522	12.9207	272.273	118.67	-2.00131	19.2004	4.01564	0.0549128	2.93536	19.2767	4.02437	0.051725	5.17756	0.369973	6.55764	0.0518762	4.02437	0.613691	C	Fig. 11e
	JR-1_1.1	2019-09-09, 12:44	0.467	3.45708e-05	0.052281	0.16194	1876.23	45.1342	61.1702	0.0248496	240.14	11.923	275.449	37.6231	1.34894	26.3048	4.03849	0.052281	1.38955	26.3215	4.03887	0.0517742	1.64242	0.271209	4.36005	0.0379917	4.03887	0.926336	R	Culled		Igneous Cores
	JR-1_2.1	2019-09-09, 12:57	0.683	0.000224983	0.0556379	0.185926	275.393	49.2858	14.2391	0.184871	376.791	15.4449	300.387	122.557	-2.83511	16.5827	4.16926	0.0556379	2.86446	16.6506	4.17907	0.0523422	5.37419	0.433434	6.80783	0.0600579	4.17907	0.613862	C	Culled		Weighted Average age (2σ)
	JR-1_2.2	2019-09-09, 13:11	0.917	3.35313e-05	0.0528608	0.0903688	1569.19	12.5134	62.3183	0.00823763	291.35	11.923	301.582	36.5615	0.38574	21.6103	4.03222	0.0528608	1.36648	21.6235	4.03257	0.0523696	1.60358	0.333929	4.33971	0.046246	4.03257	0.929225	R			403.0±3.8 Ma
	JR-1_3.1	2019-09-09, 13:25	1.15	8.43911e-05	0.0550996	0.118731	318.949	212.459	16.4982	0.688105	376.948	17.196	365.438	86.7717	-0.423371	16.5868	4.64205	0.0550996	2.5335	16.6122	4.64593	0.0538657	3.84922	0.447082	6.03334	0.0601968	4.64593	0.770043	C	Culled		MSWD: 1.3, p = 0.2, n = 19
	JR-1_3.2	2019-09-09, 13:53	1.617	8.43667e-05	0.0533117	0.0753609	2382.34	44.2434	102.866	0.0191842	316.154	11.923	288.72	38.601	-1.03115	19.8792	3.97612	0.0533117	1.21826	19.9098	3.9768	0.0520754	1.68913	0.360634	4.32066	0.0502266	3.9768	0.920415	R
	JR-1_4.1	2019-09-09, 14:07	1.85	5.05602e-05	0.0569619	0.294836	192.123	108.136	10.431	0.58142	395.088	16.837	461.257	117.573	2.3942	15.7749	4.3369	0.0569619	3.1938	15.7893	4.34679	0.0562248	5.30364	0.490983	6.85735	0.063334	4.34679	0.633888	C			Total core analyses = 22
	JR-1_5.1	2019-09-09, 14:20	2.067	0.00011959	0.0549917	0.0301101	216.842	125.118	11.9843	0.596042	401.962	18.6236	339.116	107.223	-2.30934	15.5379	4.71835	0.0549917	3.00328	15.5715	4.72419	0.0532418	4.73433	0.471436	6.68818	0.0642197	4.72419	0.706348	C	Fig. 11c		19/22 included in age
	JR-1_6.1	2019-09-09, 14:34	2.3	4.30556e-05	0.055021	0.0475284	598.381	656.38	32.6842	1.13313	397.402	18.1241	387.31	49.8165	-0.368718	15.7191	4.64636	0.055021	1.80707	15.7313	4.64712	0.0543919	2.21841	0.476727	5.14947	0.0635675	4.64712	0.902446	C
	JR-1_7.1	2019-09-09, 16:30	4.233	7.02141e-05	0.0552226	0.0481767	382.478	224.419	21.3268	0.606113	405.431	15.8098	379.221	78.9908	-0.957302	15.398	3.97236	0.0552226	2.30442	15.4175	3.97621	0.0541964	3.51258	0.484682	5.30551	0.0648612	3.97621	0.749449	C	Fig. 11c		Metamorphic Rims
	JR-1_8.1	2019-09-09, 16:44	4.467	5.5739e-05	0.0563968	0.277765	158.736	35.7039	8.22403	0.232348	377.533	13.9413	435.772	117.443	2.12162	16.5339	3.75294	0.0563968	3.36487	16.5507	3.76316	0.0555835	5.27442	0.463055	6.47927	0.0604206	3.76316	0.580801	Ff	Fig. 11c		Weighted average age (2σ)
	JR-1_8.2	2019-09-09, 16:58	4.7	1.38342e-05	0.0522295	-0.0236661	2477.94	45.2908	102.698	0.0188807	303.756	11.923	286.584	27.0466	-0.647136	20.7311	3.8188	0.0522295	1.05003	20.7364	3.81896	0.0520267	1.18308	0.345935	3.99801	0.0482244	3.81896	0.955214	R	Fig. 11c		299±14 Ma
	JR-1_9.1	2019-09-09, 17:12	4.933	4.68767e-05	0.0551569	-0.0258102	399.134	271.8	23.4805	0.703447	427.022	18.0654	390.617	67.3871	-1.32237	14.6055	4.31435	0.0551569	2.12582	14.6179	4.31664	0.0544721	3.0026	0.513797	5.25823	0.0684095	4.31664	0.82093	C	Culled		MSWD: 8, p = 1.4E-7, n = 6
	JR-1_10.1	2019-09-09, 17:53	5.617	0.000132798	0.0551246	0.0864865	253.6	10.6401	13.5406	0.0433409	388.735	17.1867	336.541	112.466	-1.92321	16.0742	4.49992	0.0551246	2.88328	16.1129	4.50744	0.0531813	4.96356	0.455079	6.70477	0.0620621	4.50744	0.672274	C
	JR-1_11.1	2019-09-09, 18:07	5.85	2.99963e-05	0.0556005	0.0653107	322.658	210.166	18.4373	0.672853	415.164	14.8347	418.82	79.569	0.132587	15.023	3.64032	0.0556005	2.47543	15.0311	3.64445	0.0551626	3.56293	0.506006	5.09672	0.0665287	3.64445	0.715059	C			Total rim analyses = 8
	JR-1_12.1	2019-09-09, 18:21	6.083	8.19089e-05	0.0574464	0.323466	246.889	26.3387	13.7653	0.110203	405.397	16.7113	462.342	86.4289	2.05621	15.3569	4.19791	0.0574464	2.75873	15.3796	4.20211	0.0562523	3.89947	0.504308	5.73268	0.065021	4.20211	0.733009	C			6/8 included in age
	JR-1_12.2	2019-09-09, 18:49	6.55	2.95555e-05	0.0527929	0.00183051	1929.68	33.5465	84.1623	0.0179582	319.271	11.923	301.158	29.9517	-0.679254	19.6948	3.79255	0.0527929	1.11873	19.7054	3.7928	0.0523599	1.31358	0.366365	4.01383	0.0507474	3.7928	0.944933	R
	JR-1_13.1	2019-09-09, 19:03	6.783	3.98646e-05	0.0527422	0.0960388	2572.53	32.3498	99.5871	0.01299	284.158	11.923	292.346	28.6551	0.309502	22.1684	4.24596	0.0527422	1.03928	22.1845	4.24619	0.0521581	1.25473	0.32417	4.4277	0.0450764	4.24619	0.959007	R	Fig. 11c		Fracture Fill
	JR-1_13.2	2019-09-09, 19:17	7.017	4.83598e-05	0.0542436	-0.0170601	404.652	289.347	21.4992	0.738647	386.873	15.7479	351.591	112.727	-1.29788	16.1706	4.13712	0.0542436	4.18653	16.1848	4.14076	0.0535362	4.98839	0.456081	6.48305	0.0617865	4.14076	0.638705	C	Fig. 11c		378 ± 14, 376 ± 15 (2σ)
	JR-1_14.1	2019-09-09, 19:30	7.233	5.99553e-05	0.0549278	-0.00573657	155.351	100.306	8.78899	0.666978	411.175	15.2396	373.194	166.173	-1.38686	15.1842	3.7717	0.0549278	3.56576	15.2007	3.79606	0.0540515	7.3816	0.490281	8.30049	0.0657865	3.79606	0.45733	C
	JR-1_15.1	2019-09-09, 19:58	7.7	9.21174e-05	0.0547801	0.0437924	269.621	156.799	14.3963	0.600744	388.741	17.8587	347.208	87.9002	-1.52819	16.0808	4.67672	0.0547801	2.68567	16.1076	4.68022	0.0534325	3.88673	0.457378	6.08368	0.0620824	4.68022	0.769307	C			Total fracture fill analyses = 2
	JR-1_16.1	2019-09-09, 20:12	7.933	-3.9879e-06	0.0553205	0.0790649	382.508	283.246	20.9923	0.764934	399.234	16.1041	427.542	68.1248	1.0283	15.6398	4.10831	0.0553205	2.29346	15.6386	4.11065	0.0553786	3.05513	0.488253	5.12164	0.0639442	4.11065	0.802603	C
	JR-1_17.1	2019-09-09, 20:26	8.167	5.86335e-05	0.0551396	0.0367227	422.25	459.597	23.568	1.12437	405.823	17.6008	382.801	65.2702	-0.84037	15.3844	4.4193	0.0551396	2.10966	15.4007	4.42126	0.0542828	2.90428	0.485985	5.28984	0.0649321	4.42126	0.835802	C	Fig. 11c
	JR-1_18.1	2019-09-09, 21:08	8.867	8.16948e-05	0.0543847	-0.0587821	245.129	260.973	13.7059	1.09977	406.511	14.6777	336.878	126.52	-2.55735	15.3722	3.67626	0.0543847	2.82622	15.3949	3.68962	0.0531892	5.58417	0.476373	6.693	0.0649564	3.68962	0.551265	C
	JR-1_19.1	2019-09-09, 21:22	9.1	-9.77986e-05	0.0547331	-0.0176025	174.844	128.25	9.79185	0.75772	407.149	16.8462	458.658	101.269	1.86029	15.341	4.21274	0.0547331	3.26049	15.314	4.21894	0.0561589	4.56609	0.505629	6.2168	0.0652998	4.21894	0.678634	C	Fig. 11c
	JR-1_20.1	2019-09-09, 21:35	9.317	1.08553e-05	0.0557716	0.0837552	324.508	214.309	18.584	0.682208	416.054	15.9523	436.96	77.2319	0.756075	14.987	3.90736	0.0557716	2.30492	14.9899	3.91141	0.0556132	3.46923	0.51154	5.22826	0.0667114	3.91141	0.748129	C	Fig. 11c
	JR-1_21.1	2019-09-09, 21:49	9.55	2.05019e-05	0.0553794	0.0881118	458.742	472.668	25.1386	1.06436	398.657	18.3479	415.478	60.4977	0.612069	15.6617	4.68867	0.0553794	2.06223	15.6675	4.69018	0.0550801	2.70738	0.484727	5.4155	0.0638265	4.69018	0.866065	C
	JR-1_22.1	2019-09-09, 22:17	10.017	4.05242e-05	0.0558596	0.0907445	213.025	222.209	12.2381	1.07754	417.327	15.1182	423.085	92.3162	0.208594	14.9388	3.68966	0.0558596	2.87961	14.9497	3.69512	0.0552681	4.1368	0.509734	5.54681	0.066891	3.69512	0.666171	C
	JR-1_23.1	2019-09-09, 22:31	10.25	0.000257804	0.0538372	0.0461482	1499.08	10.3235	71.5528	0.00711382	348.603	13.2319	197.308	73.9221	-5.71985	17.9883	3.8591	0.0538372	1.50113	18.0729	3.86282	0.0500498	3.18164	0.381834	5.00442	0.0553313	3.86282	0.771881	R	Fig. 11c, Culled
	JR-1_23.2	2019-09-09, 22:45	10.483	7.54034e-06	0.0549692	0.0501472	486.996	481.68	26.3939	1.02172	394.411	16.4374	406.486	67.4842	0.440275	15.8416	4.24474	0.0549692	1.96427	15.8437	4.24757	0.0548591	3.0153	0.477412	5.20902	0.0631165	4.24757	0.815426	C	Fig. 11c
	JR-1_23.3	2019-09-09, 22:58	10.7	0.000499286	0.057882	0.46555	84.958	5.8002	4.38685	0.0705244	376.302	14.7746	220.446	346.548	-5.84496	16.5584	3.98344	0.057882	4.71464	16.7095	4.07743	0.0505518	14.9787	0.417132	15.5237	0.0598461	4.07743	0.262659	Ff	Fig. 11c
	JR-1_24.1	2019-09-09, 23:26	11.167	8.09835e-05	0.0533643	0.191218	1757.35	34.5201	66.5078	0.0202915	277.934	11.923	293.204	42.0263	0.577768	22.6542	3.86617	0.0533643	1.33244	22.6878	3.867	0.0521777	1.8405	0.317098	4.28266	0.0440766	3.867	0.902945	R
	JR-1_24.2	2019-09-09, 23:54	11.633	3.46249e-05	0.0556635	0.104121	389.563	61.3608	21.6967	0.16271	404.974	16.656	418.634	71.6312	0.496286	15.4073	4.19038	0.0556635	2.11685	15.4169	4.19356	0.055158	3.20739	0.493301	5.27952	0.0648638	4.19356	0.794307	C
	JACK-1_1.1	2019-09-10, 00:08	11.867	5.07942e-06	0.053223	0.125846	1048.84	309.507	42.1475	0.304831	294.727	12.1543	335.148	41.1496	1.51618	21.3494	4.18293	0.053223	1.61075	21.3514	4.18329	0.0531487	1.81565	0.343216	4.56032	0.0468354	4.18329	0.917324	C	culled		Igneous Cores
	JACK-1_1.2	2019-09-10, 00:36	12.333	3.84334e-05	0.0534866	0.165594	363.37	104.478	14.479	0.297014	292.302	21.7118	325.536	110.576	1.24875	21.522	7.53316	0.0534866	2.97421	21.5371	7.5374	0.0529239	4.87062	0.338817	8.97415	0.0464315	7.5374	0.839901	C			Weighted Average age (2σ)
	JACK-1_1.3	2019-09-10, 00:50	12.567	3.27424e-05	0.0530829	0.12207	2804.89	733.607	110.839	0.270177	289.934	14.4802	311.73	28.7083	0.820811	21.7113	5.06581	0.0530829	1.07125	21.7242	5.06599	0.0526034	1.26143	0.333865	5.22067	0.0460315	5.06599	0.970371	R	High U		317.3±3.6 Ma
	JACK-1_2.1	2019-09-10, 01:04	12.8	1.02774e-05	0.0536331	0.122903	490.351	131.076	20.9927	0.276131	313.533	13.951	349.332	69.0393	1.33545	20.0399	4.51595	0.0536331	2.29158	20.0437	4.51793	0.0534827	3.0539	0.367906	5.45325	0.049891	4.51793	0.828483	C			MSWD: 1.5, p = 0.1 n = 14
	JACK-1_3.1	2019-09-10, 01:18	13.033	0.000386509	0.0534143	0.15768	88.085	82.5658	3.50523	0.968275	291.924	23.5506	85.3799	482.036	-8.00313	21.5523	8.14352	0.0534143	12.2677	21.7054	8.19096	0.0477194	20.3222	0.30313	21.9108	0.0460715	8.19096	0.373831	C
	JACK-1_4.1	2019-09-10, 01:46	13.5	-1.9094e-05	0.0523121	-0.065184	831.055	216.986	36.5378	0.269713	321.776	12.4376	311.225	55.8017	-0.394973	19.5507	3.92491	0.0523121	1.76584	19.544	3.9265	0.0525918	2.45167	0.371028	4.62905	0.0511667	3.9265	0.84823	C	Fig. 11f		Total core analyses = 17
	JACK-1_4.2	2019-09-10, 02:00	13.733	1.45331e-06	0.0530908	0.0142769	3500.67	886.133	156.848	0.261486	327.766	13.3299	331.77	21.1267	0.149315	19.1692	4.13208	0.0530908	0.871735	19.1698	4.13214	0.0530695	0.931616	0.381707	4.23585	0.0521655	4.13214	0.975514	R	Fig. 11f, High U		14/17 included in age
	JACK-1_5.1	2019-09-10, 02:28	14.2	5.58743e-05	0.05226	-0.0682343	864.317	226.369	37.8563	0.270548	320.588	13.2109	260.621	58.6628	-2.26032	19.6256	4.18439	0.05226	1.77141	19.6456	4.18598	0.0514406	2.55407	0.361028	4.90365	0.0509019	4.18598	0.853647	C	Fig. 11f
	JACK-1_6.1	2019-09-10, 02:56	14.667	-1.03055e-05	0.0532835	0.053922	927.886	73.1804	40.8705	0.0814706	322.357	11.9001	347.283	48.3938	0.92857	19.4914	3.74851	0.0532835	1.71846	19.4878	3.74948	0.0534343	2.13989	0.378059	4.31714	0.0513142	3.74948	0.86851	C	Fig. 11f		Igneous Rims
	JACK-1_6.2	2019-09-10, 03:10	14.9	2.33656e-05	0.0558819	0.217337	188.889	13.3688	9.75597	0.0731115	376.4	18.0165	434.064	124.052	2.10162	16.5952	4.86818	0.0558819	3.403	16.6023	4.8776	0.0555409	5.56957	0.461262	7.40345	0.0602328	4.8776	0.658828	I	Fig. 11f		328±23 Ma
	JACK-1_7.1	2019-09-10, 03:23	15.117	1.69402e-05	0.0535463	0.144579	329.318	99.8544	13.5792	0.313222	302.247	10.961	341.522	100.739	1.46985	20.8021	3.67559	0.0535463	2.94054	20.8085	3.68223	0.0532984	4.44995	0.353162	5.77589	0.0480572	3.68223	0.637517	C	Fig. 11f, culled		MSWD = 13, p = 9E-9, n =4
	JACK-1_8.1	2019-09-10, 03:37	15.35	1.32254e-05	0.0552514	0.0297722	1133.05	324.017	64.3413	0.295406	412.658	15.2042	414.592	33.931	0.0701942	15.1225	3.75628	0.0552514	1.31241	15.1261	3.75664	0.0550583	1.51824	0.501876	4.05184	0.0661108	3.75664	0.927144	I			Total Rim analyses = 4
	JACK-1_9.1	2019-09-10, 04:05	15.817	6.15964e-05	0.0596174	0.164944	336.937	489.598	25.2931	1.50103	540.081	19.0673	556.817	61.8323	0.58199	11.4241	3.61481	0.0596174	2.07881	11.4367	3.61738	0.0587223	2.83519	0.707953	4.59605	0.0874379	3.61738	0.787062	I	Fig. 11f		** very high U, not included in age calcs.
	JACK-1_10.1	2019-09-10, 04:19	16.05	4.02059e-05	0.0523364	-0.0589424	853.013	268.866	37.3696	0.325597	320.658	13.4944	274.244	52.9009	-1.74637	19.6194	4.27326	0.0523364	1.80462	19.6338	4.27422	0.0517469	2.30887	0.363398	4.85797	0.0509327	4.27422	0.879837	C
	JACK-1_11.1	2019-09-10, 04:33	16.283	3.1188e-05	0.0589287	0.0332363	227.779	22.1655	17.5725	0.100523	554.417	21.482	547.618	86.2885	-0.236169	11.1308	3.96886	0.0589287	2.46296	11.137	3.97497	0.0584754	3.95041	0.723944	5.60412	0.0897906	3.97497	0.709295	I	Fig. 11f		Inherited Cores
	JACK-1_12.1	2019-09-10, 04:47	16.517	-9.53805e-06	0.0532812	0.261698	466.895	202.803	15.8066	0.448699	249.186	14.4513	346.71	110.876	3.68488	25.3067	5.86745	0.0532812	3.50242	25.3023	5.87196	0.0534208	4.90224	0.291106	7.6493	0.0395221	5.87196	0.767646	C	Culled		376± 18 to 554± 21(2σ)
	JACK-1_12.2	2019-09-10, 05:15	16.983	2.56627e-06	0.0531776	-0.025227	2722.51	866.081	128.574	0.328616	345.014	12.4462	334.779	28.8352	-0.380263	18.1936	3.66758	0.0531776	1.16661	18.1944	3.66773	0.05314	1.27222	0.402703	3.88211	0.0549619	3.66773	0.944778	R	High U		Total inherited core analyses = 6
	JACK-1_13.1	2019-09-10, 05:28	17.2	3.47518e-05	0.0594912	0.271749	93.3986	73.6137	6.50332	0.814177	502.441	19.2091	566.594	142.298	2.24272	12.3032	3.90127	0.0594912	4.04818	12.3108	3.91887	0.0589864	6.53556	0.660642	7.62044	0.0812294	3.91887	0.514258	I	Fig. 11f
	JACK-1_14.1	2019-09-10, 05:42	17.433	7.51465e-05	0.052865	0.0347245	1141.93	361.882	48.4791	0.327362	310.973	13.0303	274.971	47.3159	-1.35695	20.2268	4.2534	0.052865	1.53816	20.2545	4.25427	0.0517634	2.06538	0.352372	4.72913	0.0493717	4.25427	0.899589	C	Fig. 11f
	JACK-1_15.1	2019-09-10, 05:56	17.667	6.42855e-05	0.0544656	0.213369	327.253	83.0323	14.2175	0.262098	318.058	11.6739	351.126	109.003	1.23222	19.7299	3.72263	0.0544656	2.93456	19.7531	3.73116	0.0535252	4.8232	0.373616	6.09794	0.0506251	3.73116	0.611873	C
	JACK-1_16.1	2019-09-10, 06:38	18.367	0.000185408	0.0576651	0.23085	163.113	66.0578	9.99603	0.418347	444.237	20.3163	410.518	132.529	-1.21764	13.9846	4.66354	0.0576651	3.36977	14.0314	4.67462	0.0549581	5.92576	0.540046	7.54763	0.0712685	4.67462	0.61935	I
	JACK-1_17.1	2019-09-10, 06:52	18.6	-2.11816e-05	0.0541858	0.193404	457.529	146.59	19.5489	0.330967	312.928	12.7119	391.571	84.7012	2.91754	20.0654	4.12167	0.0541858	2.47094	20.0577	4.12627	0.0544952	3.7747	0.374609	5.59236	0.0498562	4.12627	0.737841	C
	JACK-1_18.1	2019-09-10, 07:06	18.833	3.07966e-05	0.0532133	0.00108524	3069.85	606.583	141.75	0.204114	337.529	12.2897	318.59	24.4335	-0.70618	18.603	3.70087	0.0532133	0.914559	18.6134	3.70105	0.0527623	1.07491	0.39084	3.85398	0.0537246	3.70105	0.960318	R	High U
	JACK-1_19.1	2019-09-10, 07:34	19.3	4.29069e-05	0.0538575	0.121597	774.728	260.492	34.2624	0.347333	323.628	12.0279	338.596	58.0075	0.558105	19.3998	3.77385	0.0538575	1.82543	19.4149	3.77568	0.0532296	2.56104	0.378023	4.56231	0.0515068	3.77568	0.82758	C
	JACK-1_20.1	2019-09-10, 07:47	19.517	7.03243e-05	0.0530513	0.0638999	179.302	147.503	7.55979	0.849796	308.889	13.7857	286.32	153.964	-0.849725	20.3606	4.52392	0.0530513	3.88539	20.3868	4.5376	0.0520207	6.7344	0.351827	8.12046	0.0490514	4.5376	0.558786	C
	JACK-1_21.1	2019-09-10, 08:01	19.75	0.000105229	0.0530833	0.00913849	468.874	198.967	21.1033	0.438354	329.217	11.74	265.066	87.8577	-2.41273	19.0836	3.62025	0.0530833	2.42244	19.1202	3.62499	0.0515402	3.82823	0.371668	5.27218	0.0523008	3.62499	0.687569	C
	JACK-1_22.1	2019-09-10, 08:15	19.983	6.36208e-05	0.0529139	0.03096	437.242	125.093	18.7716	0.295536	314.391	13.3796	284.593	90.0748	-1.12097	20.0023	4.31861	0.0529139	2.52135	20.0255	4.32292	0.0519814	3.93865	0.357903	5.84813	0.0499362	4.32292	0.739197	C	Fig. 11f
	28C_1.1	2019-06-11, 19:40	25.133	0.00187011	0.0568666	0.43701	1354.63	8.58394	63.52	0.00654586	342.628	5.47406	---	---	-72.3933	18.239	1.61404	0.0568666	2.59205	18.8806	2.59601	0.028664	59.109	0.209325	59.1659	0.0529644	2.59601	0.0438767	R	Discordant		Igneous Cores
	28C_2.1	2019-06-11, 19:53	25.35	-9.2324e-05	0.0552978	0.0188473	380.047	129.559	21.8239	0.352152	417.151	11.4484	476.704	74.0299	2.17621	14.956	2.79333	0.0552978	2.65844	14.9311	2.79729	0.0566431	3.34835	0.523066	4.36306	0.0669742	2.79729	0.641131	C			Weighted Average age (2σ)
	28C_3.1	2019-06-11, 20:07	25.583	-3.53455e-05	0.0561372	0.140437	408.399	152.52	23.114	0.385784	411.326	14.4583	477.059	62.7091	2.40085	15.1563	3.57999	0.0561372	2.5536	15.1466	3.58112	0.0566522	2.83649	0.515707	4.56838	0.0660214	3.58112	0.783894	C			418.1±2.6 Ma
	28C_4.1	2019-06-11, 20:20	25.8	1.84709e-05	0.0543903	-0.110392	650.705	273.92	37.8822	0.43485	422.726	13.2018	375.078	45.4179	-1.69944	14.7714	3.18361	0.0543903	1.88075	14.7763	3.18396	0.0541203	2.01818	0.505005	3.7697	0.0676759	3.18396	0.844618	C			MSWD: 1.1, p = 0.34, n = 19
	28C_5.1	2019-06-11, 21:00	26.467	-1.80429e-05	0.0556761	0.020162	363.314	120.411	21.6293	0.34236	431.971	13.3278	448.991	61.0717	0.647934	14.4259	3.14379	0.0556761	2.59622	14.4213	3.14446	0.0559393	2.74905	0.534829	4.17671	0.0693421	3.14446	0.752856	C
	28C_6.1	2019-06-11, 21:14	26.7	3.26355e-05	0.0543456	-0.109916	384.55	126.592	22.2799	0.34006	420.762	18.9001	364.57	63.4449	-2.01415	14.8426	4.57918	0.0543456	2.4958	14.8513	4.57994	0.0538684	2.81401	0.500116	5.37536	0.0673342	4.57994	0.852025	C			Total core analyses = 21
	28C_7.1	2019-06-11, 21:27	26.917	4.491e-05	0.0551752	-0.0181676	420.093	136.641	24.5506	0.335998	424.298	14.645	391.578	62.4558	-1.15284	14.7013	3.51779	0.0551752	2.38033	14.7132	3.51903	0.0545191	2.78334	0.510908	4.48671	0.0679661	3.51903	0.784324	C			19/21 included in age
	28C_7.2	2019-06-11, 21:54	27.367	0.00539056	0.0653368	1.46349	1550.99	19.4832	74.5645	0.0129763	351.05	24.5366	---	---	-131.431	17.6063	7.08961	0.0653368	6.434	19.5166	7.72303	0.0207958	70.6717	0.146917	71.0924	0.0512383	7.72303	0.108634	R	Discordant
	28C_8.1	2019-06-11, 22:07	27.583	5.27395e-22	0.0551346	0.00847438	498.953	172.323	28.4241	0.356766	413.936	11.0823	416.715	48.6507	0.13651	15.0775	2.72637	0.0551346	2.17768	15.0775	2.72637	0.0551346	2.17768	0.504192	3.48932	0.0663239	2.72637	0.781346	C			Metamorphic Rims
	28C_9.1	2019-06-11, 22:21	27.817	2.76128e-05	0.056	0.155499	467.995	142.192	25.7875	0.313858	400.795	10.7221	435.346	56.1082	1.28874	15.565	2.7222	0.056	2.28389	15.5728	2.72312	0.0555971	2.51965	0.492252	3.70999	0.0642146	2.72312	0.733997	C	Culled		313 ± 10, 316± 8(2σ)
	28C_10.1	2019-06-11, 22:34	28.033	-4.44805e-05	0.057059	0.240187	282.623	93.1122	16.1827	0.340329	415.989	16.2652	517.672	71.006	3.67038	14.9659	3.98279	0.057059	2.85343	14.9539	3.9844	0.0577063	3.23423	0.53207	5.13183	0.066872	3.9844	0.77641	C
	28C_11.1	2019-06-11, 23:01	28.483	-8.26089e-05	0.0550444	-0.0268854	522.824	127.115	30.3731	0.251155	421.862	13.0788	461.234	58.0162	1.45261	14.7903	3.15952	0.0550444	2.10656	14.7683	3.16153	0.0562487	2.61706	0.52515	4.10417	0.0677127	3.16153	0.77032	C			Total rim analyses = 10
	28C_12.1	2019-06-11, 23:14	28.7	1.60082e-05	0.0547658	-0.0697985	419.369	134.169	24.5283	0.330489	424.633	9.80672	392.107	58.749	-1.14566	14.6969	2.3504	0.0547658	2.46255	14.7011	2.35111	0.054532	2.61839	0.511448	3.51904	0.068022	2.35111	0.66811	C			Discordant or high 204Pb = 8
	28C_13.1	2019-06-11, 23:28	28.933	9.24322e-05	0.0554818	0.0511226	339.178	121.103	19.3267	0.36883	414.031	5.49861	375.514	78.7757	-1.36896	15.0675	1.34239	0.0554818	2.62336	15.0927	1.35069	0.0541307	3.50073	0.494514	3.75226	0.0662572	1.35069	0.359967	C	Fig. 11b
	28C_14.1	2019-06-11, 23:41	29.15	3.15842e-05	0.0550438	-0.0155952	372.36	165.441	21.435	0.458965	418.143	15.8812	394.18	61.239	-0.83537	14.9245	3.8705	0.0550438	2.43242	14.933	3.87134	0.0545824	2.73036	0.503971	4.73731	0.0669657	3.87134	0.817202	C	Fig. 11b		Inherited Core
	28C_15.1	2019-06-12, 00:21	29.817	9.2285e-22	0.054565	-0.0519684	374.82	116.482	21.1772	0.321024	410.643	12.8979	393.465	56.3055	-0.589544	15.2115	3.19829	0.054565	2.51008	15.2115	3.19829	0.054565	2.51008	0.494586	4.06566	0.0657396	3.19829	0.78666	C			449± 20 (2σ)
	28C_16.1	2019-06-12, 00:34	30.033	4.72593e-05	0.0544432	-0.0614826	423.239	128.914	23.803	0.314641	408.816	11.209	359.695	65.4194	-1.76109	15.2832	2.79074	0.0544432	2.4556	15.2962	2.79249	0.0537521	2.89909	0.48452	4.02526	0.0653755	2.79249	0.693742	C
	28C_17.1	2019-06-12, 00:48	30.267	0.00291681	0.0893701	4.60557	1376.32	35.3898	56.4704	0.0265619	300.784	6.97476	13.0154	302.506	-11.1886	19.9717	2.30803	0.0893701	3.9447	21.0938	2.37353	0.0463152	12.5809	0.30274	12.8028	0.0474073	2.37353	0.185392	R	Discordant
	28C_18.1	2019-06-12, 01:15	30.717	0.00395889	0.0619951	1.11562	1461.73	21.3993	65.6693	0.0151228	328.627	6.49739	---	---	-18490.8	18.9072	2.00183	0.0619951	2.18908	20.3747	5.15261	0.00024199	16832.1	0.0016376	16832.1	0.0490805	5.15261	0.000306118	R	Discordant
	28C_19.1	2019-06-12, 01:28	30.933	4.26454e-05	0.055236	-0.0108579	464.171	137.077	27.1309	0.305061	424.364	9.98478	395.44	60.3482	-1.01442	14.6979	2.39535	0.055236	2.31805	14.7092	2.397	0.054613	2.69124	0.511928	3.60394	0.0679848	2.397	0.665106	C
	28C_20.1	2019-06-12, 01:41	31.15	8.71583e-05	0.0537831	0.132711	2600.58	28.7373	112.091	0.011415	315.611	8.14577	306.538	31.9829	-0.302709	19.9028	2.62021	0.0537831	1.05897	19.9345	2.62085	0.0525065	1.40401	0.363169	2.97323	0.0501643	2.62085	0.881483	R	Fig. 11b
	28C_21.1	2019-06-12, 02:22	31.833	1.72477e-05	0.0553042	-0.0073482	335.863	116.789	19.708	0.359202	425.968	15.2977	413.379	60.523	-0.420222	14.6401	3.66021	0.0553042	2.53579	14.6447	3.66073	0.0550524	2.70752	0.518319	4.5532	0.0682841	3.66073	0.803991	C	Fig. 11b
	28C_22.1	2019-06-12, 02:35	32.05	7.36108e-05	0.055128	-0.0195119	438.618	149.061	25.5415	0.351057	422.829	15.8456	372.233	67.5819	-1.80744	14.7543	3.81986	0.055128	2.36426	14.7739	3.82171	0.0540519	3.00155	0.50445	4.8595	0.067687	3.82171	0.78644	C
	28C_23.1	2019-06-12, 02:48	32.267	0.00105987	0.0535332	-0.0350648	1633.13	9.38643	81.1172	0.00593716	362.37	14.4507	-505.715	1187.63	-35.4728	17.3003	4.05648	0.0535332	1.78288	17.6395	4.54093	0.0377249	44.556	0.294879	44.7868	0.056691	4.54093	0.10139	R	Fig. 11b, Discordant
	28C_23.2	2019-06-12, 03:02	32.5	1.47481e-05	0.0556652	0.0615846	406.926	131.639	23.4183	0.334171	418.03	12.6996	429.441	55.2975	0.448431	14.9171	3.09452	0.0556652	2.34631	14.9211	3.09498	0.05545	2.4807	0.512391	3.96645	0.0670191	3.09498	0.780289	C	Fig. 11b
	28C_24.1	2019-06-12, 03:28	32.933	0.00127476	0.0630366	1.23358	1051.17	158.366	47.793	0.155629	332.483	12.3927	-102.211	202.214	-17.0572	18.6599	3.78578	0.0630366	1.70083	19.1028	3.80964	0.0441712	8.22623	0.318818	9.06555	0.0523483	3.80964	0.420233	R	Discordant
	28C_25.1	2019-06-12, 03:42	33.167	0.00205623	0.0827951	3.86499	1656.84	41.7271	62.0987	0.0260159	275.309	3.3774	314.116	187.928	1.50258	22.0329	1.18576	0.0827951	3.49193	22.8933	1.2492	0.0526816	8.26096	0.317286	8.35487	0.0436808	1.2492	0.149517	R	High common Pb
	28C_26.1	2019-06-12, 03:55	33.383	0.000173489	0.0551863	0.314243	1080.22	16.0608	46.1946	0.0153587	313.193	9.16127	312.557	59.8418	0.0135889	20.0238	2.9682	0.0551863	1.64934	20.0873	2.97102	0.0526455	2.6298	0.361361	3.96772	0.0497827	2.97102	0.748798	R	Fig. 11b
	28C_26.2	2019-06-12, 04:35	34.05	8.63896e-05	0.0586458	0.486763	277.425	96.1168	15.238	0.357893	399.556	7.39714	505.523	78.7799	3.84181	15.563	1.87614	0.0586458	2.76418	15.5873	1.88266	0.0573881	3.58087	0.507635	4.04562	0.0641547	1.88266	0.465357	C	Fig. 11b, culled
	28C_27.1	2019-06-12, 04:49	34.283	0.000721403	0.0709173	1.84732	326.458	270.118	20.2486	0.854726	449.433	20.3414	618.966	177.015	5.9714	13.5934	4.60324	0.0709173	4.71326	13.7722	4.62514	0.0604552	8.20187	0.605244	9.41608	0.0726099	4.62514	0.491195	I	Fig. 11b
	28C_28.1	2019-06-12, 05:02	34.5	-1.3264e-13	0.0545995	-0.0853665	470.243	145.293	27.3947	0.319169	423.002	13.6125	394.884	50.6923	-0.985454	14.7578	3.27957	0.0545995	2.26041	14.7578	3.27957	0.0545995	2.26041	0.510117	3.9831	0.067761	3.27957	0.823373	C
	28C_28.2	2019-06-12, 05:16	34.733	0.000721331	0.0570403	0.454728	1246.43	20.6788	58.6752	0.0171379	343.933	4.43662	17.1263	138.222	-12.606	18.1647	1.30683	0.0570403	1.58558	18.4059	1.34277	0.0463945	5.75296	0.347545	5.90759	0.0543304	1.34277	0.227296	R	Discordant
	28A_1.1	2019-06-10, 18:45	0.217	-2.16113e-05	0.0558429	0.143407	326.198	53.2819	17.862	0.168732	398.37	5.44426	457.657	67.5383	2.18003	15.6646	1.37883	0.0558429	2.8476	15.6585	1.38104	0.056158	3.0447	0.494496	3.34328	0.063863	1.38104	0.413081	C			Igneous Cores
	28A_2.1	2019-06-10, 18:59	0.45	0.0142766	0.258417	26.0885	2240.09	83.4275	59.9908	0.038472	197.907	3.57721	104.899	618.637	-3.61914	23.7075	1.6263	0.258417	1.89519	32.1538	2.10567	0.0481354	26.1764	0.206411	26.2609	0.0311006	2.10567	0.0801826		Fig. 11d, High common Pb		Weighted Average age (2σ)
	28A_3.1	2019-06-10, 19:12	0.667	0.0224849	0.374176	40.4516	3106.84	171.119	94.4741	0.0568959	224.256	12.4174	-391.952	1132.59	-25.4802	16.8217	5.44792	0.374176	1.6498	28.6467	5.69758	0.0393898	43.4967	0.189588	43.8682	0.034908	5.69758	0.129879		High common Pb		404±7 Ma
	28A_4.1	2019-06-10, 19:25	0.883	0.0123893	0.235611	23.3192	2430.83	46.1423	57.9083	0.0196085	176.342	3.36397	395.012	648.878	8.36708	27.65	1.26308	0.235611	3.77034	35.8334	1.85983	0.0546026	28.9346	0.210101	28.9943	0.027907	1.85983	0.0641447		High common Pb		MSWD: 3.8, p = 0.004, n = 5
	28A_5.1	2019-06-10, 19:52	1.333	0.00679722	0.154885	13.1405	2065.6	104.279	53.9383	0.0521493	193.044	12.3158	440.119	272.303	9.36054	28.5733	6.43902	0.154885	0.966255	32.6596	6.49266	0.0557165	12.2385	0.23522	13.854	0.0306189	6.49266	0.468647		High common Pb
	28A_6.1	2019-06-10, 20:06	1.567	0.0109207	0.204457	19.1438	1921.11	43.7796	64.3895	0.0235407	246.746	4.36115	-199.139	703.995	-17.9704	20.7226	1.45325	0.204457	3.30643	25.9065	1.78792	0.0424791	28.1018	0.226083	28.1586	0.0386003	1.78792	0.0634945		High common Pb		Total core analyses = 8
	28A_7.1	2019-06-10, 20:19	1.783	0.022679	0.37991	41.3007	3657.59	272.05	98.1242	0.076834	198.249	12.1053	-98.0936	1015.45	-11.9007	18.7951	6.047	0.37991	1.49892	32.2538	6.34517	0.0442453	41.3423	0.189142	41.8264	0.0310041	6.34517	0.151703		Fig. 11d, High common Pb		5/8 included in age
	28A_7.2	2019-06-10, 20:32	2	0.00475231	0.122185	8.63453	1747.44	44.4643	75.7685	0.0262851	317.45	11.5289	309.767	1110.51	-0.250411	18.1004	3.00714	0.122185	12.8432	19.8154	3.82759	0.052581	48.7781	0.365871	48.9281	0.0504659	3.82759	0.0782289		Fig. 11d, High common Pb
	28A_8.1	2019-06-10, 21:13	2.683	0.00905216	0.167948	14.9459	3605.64	76.0644	70.3619	0.0217921	144.808	3.44293	-975.617	978.081	-49.6452	37.4398	2.31314	0.167948	2.50862	44.9621	2.58002	0.0318979	33.1715	0.0978174	33.2717	0.022241	2.58002	0.0775441		Fig. 11d, High common Pb		Metamorphic Rims
	28A_9.1	2019-06-10, 21:26	2.9	0.0077136	0.153126	13.1626	3698.47	197.441	60.3826	0.0551463	121.372	2.95094	-481.543	2196.23	-25.6385	45.6888	2.15194	0.153126	5.24888	53.3027	4.31202	0.0380695	82.8091	0.0984757	82.9213	0.0187608	4.31202	0.0520014		High common Pb		308.0±4.1 Ma
	28A_9.2	2019-06-10, 21:39	3.117	0.0131658	0.250516	25.2735	2877.06	103.206	60.3179	0.0370559	155.445	6.47969	577.384	366.433	15.7889	30.6175	4.1901	0.250516	0.746445	40.452	4.36745	0.0593055	16.8605	0.202142	17.4169	0.0247206	4.36745	0.250759		High common Pb		MSWD: 1.4, p = 0.24, n = 4
	28A_10.1	2019-06-10, 22:06	3.567	0.00533292	0.125705	9.49693	2285.25	52.834	58.5445	0.0238825	189.444	2.81388	50.6426	379.907	-5.46539	30.3461	1.38097	0.125705	3.36077	33.6504	1.5616	0.0470483	15.9126	0.192777	15.989	0.0297173	1.5616	0.097667		High common Pb
	28A_11.1	2019-06-10, 22:19	3.783	0.0026903	0.0923087	5.03061	1529.74	28.8478	58.7324	0.0194803	281.874	9.86707	324.421	192.675	1.63941	21.2479	3.53859	0.0923087	2.31608	22.3462	3.57167	0.052921	8.4852	0.326532	9.20628	0.0447504	3.57167	0.387961	R	Culled		Total rim analyses = 6
	28A_12.1	2019-06-10, 22:33	4.017	0.00968826	0.190995	17.7744	2394.53	65.4378	52.6625	0.0282299	162.969	3.08716	114.292	419.008	-1.88566	32.1158	1.89315	0.190995	0.873416	39.1077	2.16244	0.0483272	17.7605	0.170385	17.8916	0.0255704	2.16244	0.120863		High common Pb		4/6 included in age
	28A_13.1	2019-06-10, 22:46	4.233	0.0174179	0.311152	32.8493	2458.41	47.3201	54.2074	0.0198834	163.385	6.01355	515.807	653.462	13.2822	26.1602	3.4465	0.311152	2.36892	38.5512	3.83579	0.0576573	29.7548	0.206214	30.0011	0.0259395	3.83579	0.127855		High common Pb
	28A_13.2	2019-06-10, 23:13	4.683	0.0126829	0.233836	23.2803	3134.4	85.6584	54.811	0.0282303	129.914	3.01062	31.8163	532.824	-3.90466	37.6866	2.31305	0.233836	0.79453	49.2441	2.63669	0.0466795	22.2385	0.130699	22.3943	0.020307	2.63669	0.11774		High common Pb		Inherited Core
	28A_14.1	2019-06-10, 23:26	4.9	0.0064865	0.143812	11.9127	2745.31	198.708	53.7342	0.0747694	145.239	2.43245	112.32	373.965	-1.26678	38.6587	1.64349	0.143812	1.86407	43.9244	1.86465	0.0482869	15.8454	0.151574	15.9548	0.0227664	1.86465	0.116871		High common Pb		631± 14(2σ)
	28A_15.1	2019-06-10, 23:53	5.35	0.0176403	0.303895	32.2212	4001.24	71.2653	53.5463	0.0183986	99.6548	6.85409	-223.134	1851.85	-13.4002	43.5064	5.96573	0.303895	6.18822	64.6699	6.19295	0.0420751	73.5721	0.0897065	73.8323	0.0154631	6.19295	0.0838786		High common Pb		Total inherited core analyses = 1
	28A_16.1	2019-06-11, 00:20	5.8	1.44463e-05	0.0556749	0.0837005	451.064	174.575	25.5192	0.399802	411.178	16.7928	430.007	54.9147	0.717735	15.1705	4.16152	0.0556749	2.33401	15.1745	4.16184	0.0554641	2.46377	0.503963	4.83643	0.0659	4.16184	0.860519	C
	28A_17.1	2019-06-11, 00:33	6.017	0.0246211	0.413784	46.1354	3135.08	42.3625	35.7245	0.0139583	84.9529	2.63812	354.845	868.719	10.5734	40.6049	2.92722	0.413784	1.11284	74.8223	3.77767	0.0536367	38.4646	0.09884	38.6497	0.013365	3.77767	0.0977413		High common Pb		Metamict (very high U & 204Pb)
	28A_17.2	2019-06-11, 00:47	6.25	-6.48631e-05	0.0560351	0.278134	134.166	112.41	6.64594	0.86549	361.415	11.6865	489.796	128.934	4.69069	17.293	3.27265	0.0560351	4.90247	17.2727	3.28108	0.0569799	5.84481	0.454844	6.70279	0.0578948	3.28108	0.48951	C			Total metamict analyses = 27
	28A_18.1	2019-06-11, 01:01	6.483	0.0120145	0.244641	24.2297	2530.16	130.87	79.0763	0.0534307	230.378	35.8053	1018.9	4002.99	27.2105	20.8254	9.16154	0.244641	31.6627	26.7147	16.3404	0.0732105	197.678	0.377853	198.352	0.0374325	16.3404	0.0823809		High common Pb
	28A_19.1	2019-06-11, 01:28	6.933	0.0159514	0.294608	30.676	2470.45	177.916	61.9235	0.0743942	185.415	10.3217	755.48	400.124	20.6609	23.7573	5.56548	0.294608	1.46101	33.6415	5.72735	0.064449	18.9601	0.264145	19.8063	0.0297252	5.72735	0.289169		High common Pb
	28A_20.1	2019-06-11, 01:43	7.183	0.0352289	0.604102	67.6353	2091.54	60.3058	130.641	0.0297847	452.487	567.364	2344.05	10388.9	49.4783	4.45094	83.4521	0.604102	42.1772	12.1593	116.95	0.149901	607.429	1.6998	618.585	0.0822415	116.95	0.18906		High common Pb
	28A_21.1	2019-06-11, 01:56	7.4	7.51418e-06	0.0528351	0.0200003	1206.47	4.92124	51.6971	0.00421364	313.806	8.41992	315.996	40.0023	0.119458	20.0427	2.72244	0.0528351	1.70497	20.0455	2.72258	0.0527251	1.75902	0.362662	3.24139	0.0498866	2.72258	0.839943	R
	28A_22.1	2019-06-11, 02:10	7.633	0.000398656	0.0632351	1.12843	201.983	74.1994	10.4078	0.379478	375.541	12.3161	507.185	152.603	4.78455	16.4824	3.32887	0.0632351	3.32385	16.6023	3.35528	0.0574315	6.93841	0.476961	7.70711	0.0602326	3.35528	0.435349	C	Fig. 11d
	28A_23.1	2019-06-11, 02:50	8.3	3.08723e-05	0.0574694	0.228924	773.79	329.524	46.5226	0.439911	436.107	12.0647	491.339	41.0379	2.00967	14.2547	2.82135	0.0574694	1.67113	14.2626	2.8219	0.0570198	1.86081	0.551224	3.38019	0.0701134	2.8219	0.834833	C	Fig. 11d, culled
	28A_23.2	2019-06-11, 03:04	8.533	0.00198592	0.0850354	4.15393	1491.91	77.2268	55.2623	0.0534719	272.152	4.65951	454.36	237.035	6.79089	22.227	1.62766	0.0850354	5.44067	23.0645	1.68841	0.0560747	10.6797	0.335216	10.8123	0.0433568	1.68841	0.156155	R	Fig. 11d, Culled
	28A_24.1	2019-06-11, 03:17	8.75	0.00880073	0.182654	16.547	2090.13	107.65	60.2215	0.0532037	212.676	10.3731	368.922	1097.82	5.96586	24.8804	4.27831	0.182654	8.94587	29.6806	4.8196	0.0539725	48.7297	0.250727	48.9675	0.0336921	4.8196	0.0984245		High common Pb
	28A_25.1	2019-06-11, 03:44	9.2	0.000428863	0.0582386	0.731794	1588.11	25.0221	65.0275	0.0162759	300.186	12.6618	282.312	77.9564	-0.636448	20.8251	4.27926	0.0582386	1.54727	20.9892	4.28344	0.0519522	3.40736	0.341278	5.47338	0.0476434	4.28344	0.782594	R
	28A_26.1	2019-06-11, 03:57	9.417	-3.89574e-22	0.0598104	-0.120698	542.788	350.327	47.9615	0.66672	631.179	14.9505	595.78	33.9545	-1.17197	9.73318	2.43228	0.0598104	1.56717	9.73318	2.43228	0.0598104	1.56717	0.847273	2.89345	0.102741	2.43228	0.840619	I	Fig. 11d
	28A_27.1	2019-06-11, 04:11	9.65	0.0158792	0.28935	29.858	2123.37	54.5929	63.7333	0.026559	221.405	2.75442	547.07	717.405	12.0782	20.0738	1.06216	0.28935	1.3067	28.3364	2.56105	0.0584861	32.8408	0.284583	32.9405	0.0352903	2.56105	0.0777478		High common Pb
	28A_28.1	2019-06-11, 04:24	9.867	8.13176e-14	0.0551878	0.00736967	385.259	130.912	22.085	0.351015	416.453	10.1175	418.867	55.0398	0.123151	14.9836	2.47217	0.0551878	2.46459	14.9836	2.47217	0.0551878	2.46459	0.507841	3.49082	0.0667396	2.47217	0.708192	C
	28A_29.1	2019-06-11, 04:51	10.317	0.000358692	0.0601467	0.943208	1613.08	58.4209	68.0663	0.0374122	309.134	9.87778	407.517	63.4429	3.68057	20.1651	3.24261	0.0601467	1.32419	20.2978	3.24689	0.0549083	2.83523	0.372984	4.31055	0.0492665	3.24689	0.753242	R
	28A_29.2	2019-06-11, 05:04	10.533	0.0378766	0.602773	69.1705	2368	143.148	65.3689	0.0624458	203.905	7.07488	-526.482	2294.85	-30.7392	9.59334	2.68299	0.602773	0.921913	31.6153	4.21177	0.0374328	85.7249	0.163251	85.8283	0.0316302	4.21177	0.0490721		High common Pb
	28A_30.1	2019-06-11, 05:31	10.983	0.0135655	0.254253	25.9937	4705.02	65.92	59.1824	0.0144729	93.7121	2.1691	473.377	410.161	14.6037	50.5395	2.22142	0.254253	1.59331	67.5467	2.49857	0.056558	18.5408	0.115449	18.7084	0.0148046	2.49857	0.133553		High common Pb
	28A_31.1	2019-06-11, 05:58	11.433	0.0212377	0.364614	39.4921	2392.16	66.3781	57.0867	0.0286639	176.647	9.68225	376.445	1297.46	7.66651	21.7801	4.32126	0.364614	4.56897	35.7913	4.7184	0.0541532	57.6675	0.208616	57.8603	0.0279398	4.7184	0.0815482		High common Pb
	28A_32.1	2019-06-11, 06:11	11.65	-5.78467e-06	0.0549264	-0.00805881	1057.98	50.0611	59.8151	0.0488792	410.907	7.58322	411.693	33.7484	0.0643021	15.1948	1.87917	0.0549264	1.48017	15.1932	1.87928	0.0550109	1.5093	0.49923	2.41033	0.065819	1.87928	0.779678	C
	28A_32.2	2019-06-11, 06:24	11.867	0.00658892	0.149611	12.254	1968.82	81.3876	69.1823	0.0427025	258.452	10.6594	335.244	727.769	2.93782	21.4502	3.85242	0.149611	7.59663	24.3921	4.09744	0.053174	32.112	0.300574	32.3723	0.0409969	4.09744	0.126572		Fig. 11d, High common Pb
	28A_33.1	2019-06-11, 06:38	12.1	1.57244e-05	0.0542364	-0.0755506	420.074	4.90001	23.3984	0.0120496	405.014	12.1732	370.341	58.5517	-1.23159	15.4334	3.05973	0.0542364	2.44509	15.4378	3.06026	0.0540065	2.59962	0.48235	4.01537	0.0647761	3.06026	0.762135	C	Fig. 11d
	28A_33.2	2019-06-11, 07:05	12.55	0.00634349	0.136314	10.946	3012.8	125.096	62.1294	0.0428916	152.929	7.07017	-216.844	1196.89	-15.1893	37.0954	4.61052	0.136314	3.50988	42.0183	5.20089	0.0421804	47.6101	0.138412	47.8934	0.0237992	5.20089	0.108593		Fig. 11d, High common Pb
	28A_34.1	2019-06-11, 07:18	12.767	0.000167128	0.0543354	0.229838	1541.82	24.8467	64.3331	0.0166469	305.763	6.01375	279.368	51.8942	-0.957247	20.5397	1.99423	0.0543354	1.42617	20.6025	1.99725	0.0518854	2.26702	0.347238	3.02132	0.0485379	1.99725	0.661052	R
	28B_1.1	2019-06-11, 07:31	12.983	-1.91039e-05	0.0562114	0.0534935	294.765	164.837	17.9944	0.57767	442.581	26.0275	470.708	65.5106	1.04242	14.0637	6.00128	0.0562114	2.80591	14.0589	6.00167	0.0564898	2.95996	0.554014	6.6919	0.0711295	6.00167	0.896857	C			Igneous Cores
	28B_2.1	2019-06-11, 07:45	13.217	3.89843e-13	0.0545156	-0.0943625	152.984	81.1494	8.90245	0.547949	422.55	23.1043	391.433	87.5594	-1.09501	14.7754	5.57206	0.0545156	3.90198	14.7754	5.57206	0.0545156	3.90198	0.508726	6.80244	0.0676802	5.57206	0.819126	C	Fig. 11a		Weighted average age (2σ)
	28B_3.1	2019-06-11, 08:12	13.667	-3.61801e-22	0.0547713	-0.0946456	226.083	119.645	13.491	0.546673	432.95	16.5834	401.923	70.0039	-1.08816	14.4087	3.90359	0.0547713	3.12538	14.4087	3.90359	0.0547713	3.12538	0.524117	5.00061	0.0694024	3.90359	0.780624	C	Fig. 11a		424.6±3.6 Ma
	28B_4.1	2019-06-11, 08:25	13.883	0.00063433	0.0706546	2.06374	123.225	131.377	6.26176	1.10134	370.496	18.7926	654.667	213.008	10.0831	16.5554	5.15077	0.0706546	4.0598	16.7479	5.19441	0.0614665	9.92834	0.506033	11.2051	0.0597088	5.19441	0.463576	C	High common Pb		MSWD: 1.3, p = 0.21, n = 13
	28B_5.1	2019-06-11, 08:39	14.117	9.01984e-05	0.0525884	-0.0521415	1353.12	12.246	60.6991	0.00934882	328.148	10.6821	251.77	45.8644	-2.83972	19.1591	3.3064	0.0525884	1.47709	19.1906	3.30742	0.0512652	1.99367	0.368329	3.86183	0.0521089	3.30742	0.856439	R	Fig. 11a
	28B_6.1	2019-06-11, 08:52	14.333	-4.15632e-05	0.0549019	-0.0473314	141.754	89.1119	8.25375	0.649382	422.787	10.6469	431.788	162.435	0.360803	14.7599	2.52441	0.0549019	7.03732	14.7488	2.52885	0.0555084	7.28994	0.518922	7.71611	0.067802	2.52885	0.327737	C			Total analyses = 17
	28B_7.1	2019-06-11, 09:19	14.783	7.7548e-05	0.0549696	-0.0197918	158.712	93.8544	9.0995	0.610865	416.512	18.3153	363.199	111.211	-1.91091	14.9855	4.47741	0.0549696	3.84047	15.0065	4.4818	0.0538357	4.9314	0.494643	6.66373	0.0666377	4.4818	0.672567	C			High 204Pb = 4
	28B_8.1	2019-06-11, 09:32	15	8.27954e-05	0.0533209	-0.251969	269.554	108.923	15.8107	0.417422	425.804	13.9232	289.145	84.6824	-4.99586	14.6818	3.33122	0.0533209	2.81051	14.7037	3.33457	0.0521077	3.70589	0.488625	4.98528	0.0680099	3.33457	0.668884	C	Fig. 11a		13/17 included in age
	28B_9.1	2019-06-11, 09:45	15.217	-4.86597e-06	0.0531556	0.0177168	1616.62	15.5692	72.5684	0.00994855	328.366	7.29706	337.49	31.679	0.376965	19.1326	2.2563	0.0531556	1.37448	19.131	2.25637	0.0532268	1.39836	0.383614	2.65454	0.0522713	2.25637	0.850002	R
	28B_9.2	2019-06-11, 09:59	15.45	3.61891e-21	0.05648	0.224811	171.636	110.543	9.37809	0.665309	397.531	14.5558	470.323	136.02	2.66422	15.6859	3.70674	0.05648	6.14536	15.6859	3.70674	0.05648	6.14536	0.496461	7.17673	0.0637513	3.70674	0.516495	C	Culled		Metamorphic Rims
	28B_10.1	2019-06-11, 10:26	15.9	-0.000106316	0.0556271	0.0415097	222.114	125.947	12.9411	0.585749	423.05	15.4922	497.341	90.2899	2.69525	14.7373	3.72968	0.0556271	3.1726	14.7091	3.73459	0.0571753	4.0983	0.53595	5.54466	0.0679853	3.73459	0.673548	C			Weighted average age (2σ)
	28B_11.1	2019-06-11, 10:39	16.117	1.57415e-05	0.0554992	0.00221232	364.256	159.54	21.6195	0.452442	430.7	9.58957	422.167	57.3869	-0.272798	14.4725	2.26614	0.0554992	2.42218	14.4767	2.26685	0.0552694	2.57117	0.526403	3.42775	0.0690767	2.26685	0.661322	C			324.4 ± 3.2 Ma
	28B_12.1	2019-06-11, 10:53	16.35	-1.56806e-05	0.0552606	-0.0274402	412.481	153.049	24.485	0.383289	430.756	16.064	431.026	57.2456	0.0452238	14.4749	3.80218	0.0552606	2.44365	14.4708	3.8026	0.0554894	2.5688	0.528711	4.58895	0.0691047	3.8026	0.828642	C			MSWD: 2.0, p = 0.06, n = 7
	28B_13.1	2019-06-11, 11:06	16.567	0.000499404	0.0581382	0.369276	151.557	78.9462	8.70873	0.53809	417.413	7.04236	231.148	258.627	-6.88527	14.8939	1.65755	0.0581382	6.40892	15.0294	1.73882	0.0508085	11.2002	0.466118	11.3344	0.0665362	1.73882	0.153411	C
	28B_18.1	2019-06-11, 11:38	17.1	0.000119673	0.0543706	0.206001	1069.3	9.77463	46.078	0.00944277	315.533	6.71588	311.364	53.337	-0.118808	19.8932	2.15873	0.0543706	1.63569	19.9367	2.16133	0.0526179	2.34344	0.3639	3.18796	0.0501588	2.16133	0.677967	R			Total analyses = 8
	28B_18.2	2019-06-11, 11:51	17.317	0.00113017	0.0759781	2.73273	236.189	236.241	11.9069	1.03323	367.637	15.9723	587.01	235.548	7.8721	16.5738	4.41172	0.0759781	3.14621	16.9206	4.47465	0.059569	10.8557	0.485408	11.7417	0.0590997	4.47465	0.381089	C	High common Pb		High 204Pb = 1
	28B_19.1	2019-06-11, 12:39	18.117	2.21458e-05	0.054087	-0.195486	260.057	121.2	15.7151	0.48143	438.255	15.9186	360.16	71.5759	-2.80613	14.2427	3.70286	0.054087	2.91558	14.2484	3.70372	0.0537632	3.17218	0.520258	4.8765	0.0701832	3.70372	0.759504	C	Fig. 11a		7/8 included in age
	28B_19.2	2019-06-11, 12:52	18.333	9.73848e-06	0.0526586	-0.00998203	1692.05	13.1167	73.1629	0.00800775	316.588	10.25	306.949	32.7628	-0.323865	19.8682	3.28698	0.0526586	1.38209	19.8717	3.28708	0.0525159	1.43835	0.364382	3.588	0.0503227	3.28708	0.916131	R	Fig. 11a
	28B_20.1	2019-06-11, 13:19	18.783	2.31282e-05	0.0549209	-0.0350358	218.629	87.9685	12.6287	0.415643	419.533	10.9215	394.206	120.981	-0.884731	14.8763	2.6318	0.0549209	5.2154	14.8825	2.63313	0.054583	5.39399	0.505687	6.00238	0.0671929	2.63313	0.438681	C	Fig. 11a
	28B_21.1	2019-06-11, 13:32	19	0.000212171	0.0539029	0.104877	1374.7	16.6702	62.0882	0.0125266	330.333	8.13205	230.235	79.0988	-3.74221	18.9992	2.49817	0.0539029	1.99326	19.0728	2.50389	0.0507885	3.42493	0.367156	4.2426	0.0524306	2.50389	0.590179	R
	28B_22.1	2019-06-11, 13:46	19.233	1.33284e-05	0.0531331	0.0221755	1178.22	16.251	52.4769	0.014248	325.869	10.7611	325.152	38.9032	0.0104418	19.2821	3.35351	0.0531331	1.62584	19.2868	3.35369	0.052938	1.71348	0.378449	3.76606	0.0518489	3.35369	0.890502	R
	28B_23.1	2019-06-11, 13:59	19.45	0.00250124	0.0726739	2.42534	1720.72	18.2048	78.6932	0.0109289	334.379	10.0529	-689.949	1513.7	-42.8416	18.3275	2.60246	0.0726739	17.307	19.2009	3.11234	0.0352519	54.6301	0.253141	54.7186	0.052081	3.11234	0.056879	R	High common Pb
	28B_24.1	2019-06-11, 14:26	19.9	0.000168886	0.0544788	0.184529	1783.06	20.2869	79.8388	0.011753	327.561	9.44875	284.566	49.629	-1.57551	19.1489	2.92976	0.0544788	1.28836	19.2079	2.9318	0.0520034	2.17009	0.373296	3.64757	0.0520618	2.9318	0.803769	R	Fig. 11a
	28B_24.2	2019-06-11, 14:39	20.117	1.74305e-05	0.0537612	-0.21924	334.385	147.362	19.9508	0.455239	432.886	15.2853	349.34	62.6937	-3.01184	14.4289	3.59974	0.0537612	2.59102	14.4334	3.60029	0.0535062	2.77321	0.511137	4.54453	0.0692838	3.60029	0.792224	C	Fig. 11a
	28B_25.1	2019-06-11, 14:52	20.333	0.000744754	0.0682251	1.66266	295.124	186.608	16.3422	0.653169	402.711	14.9704	505.312	217.133	3.71885	15.2548	3.76006	0.0682251	5.48089	15.463	3.79618	0.0573827	9.86923	0.511668	10.5742	0.0646705	3.79618	0.359005	C	High common Pb
	iIsotopic data collected during three analytical sessions on the Stanford-U.S. Geological Survey sensitive high-resolution ion microprobe-reverse geometry.
	iiPercent of total 206Pb that is common 206Pb.
	iii207Pb corrected radiogenic 206Pb in ppm.
	iv207Pb corrected 206Pb/238U ages used to determine weighted averages. Decay constants from Steiger and Jäger (1977). Spot analyses highlighted in grey were not included in age calculation.
	v204Pb corrected 207Pb/206Pb age.
	viDiscordance calculated as 100 x (1-[ (1/.000155125)*Ln(206/238U +1)/(1/.00098485)*Ln(207/235U +1)])
	viiRadiogenic ratios, uncorrected for common Pb.
	viiiRadiogenic ratios, corrected for common Pb using the 204Pb correction method, based on Stacey and Kramers (1975) model.
	ixRadiogenic ratios, corrected for common Pb using the 204Pb correction method and used for plotting concordia plots.
	xExpected analysis type based on petrography (cathodoluminescence, back-scatter electron) and spot placement.
	xiSpot specific notes.
	*Indicates radiogenic.
